# 1 Identification of Paired-related Homeobox Protein 1 as a key mesenchymal 2 transcription factor in Idiopathic Pulmonary Fibrosis

3  
4 E. Marchal-Duval<sup>1,\*</sup>, M. Homps-Legrand<sup>1,\*</sup>, A. Froidure<sup>1,2</sup>, M. Jaillet<sup>1</sup>, M. Ghanem<sup>1,3</sup>, L.  
5 Deneuille<sup>1,3</sup>, A. Justet<sup>1,3</sup>, A. Maurac<sup>1</sup>, A. Vadel<sup>1</sup>, E. Fortas<sup>1</sup>, A. Cazes<sup>1,4</sup>, A. Joannes<sup>1,5</sup>, L.  
6 Giersch<sup>1</sup>, H. Mal<sup>6</sup>, P. Mordant<sup>1,7</sup>, C.M. Mounier<sup>8,9</sup>, K. Schirduan<sup>10</sup>, M. Korfei<sup>11</sup>, A. Gunther<sup>11</sup>, B.  
7 Mari<sup>8</sup>, F. Jaschinski<sup>10</sup>, B. Crestani<sup>1,3</sup>, A.A. Mailleux<sup>1,\$</sup>

8  
9 <sup>1</sup> Institut National de la Santé et de la Recherche Médical, UMR1152, Labex Inflammex, DHU FIRE,  
10 Université de Paris, Faculté de médecine Xavier Bichat, 75018 Paris, France;

11 <sup>2</sup> Institut de Recherche Expérimentale et Clinique, Pôle de Pneumologie, Université catholique de  
12 Louvain, Belgium Service de pneumologie, Cliniques Universitaires Saint-Luc, Brussels, Belgium;

13 <sup>3</sup> Assistance Publique des Hôpitaux de Paris, Hôpital Bichat, Service de Pneumologie A, DHU FIRE,  
14 Paris, France ;

15 <sup>4</sup> Assistance Publique des Hôpitaux de Paris, Hôpital Bichat, Département d'Anatomopathologie, DHU  
16 FIRE, Paris, France ;

17 <sup>5</sup> Univ Rennes, Inserm, EHESP, Irset (Institut de recherche en santé, environnement et travail) - UMR\_S  
18 1085, F-35000 Rennes, France

19 <sup>6</sup> Assistance Publique des Hôpitaux de Paris, Hôpital Bichat, Service de Pneumologie et  
20 Transplantation, DHU FIRE, Paris, France ;

21 <sup>7</sup> Assistance Publique des Hôpitaux de Paris, Hôpital Bichat, Service de Chirurgie Thoracique et  
22 Vasculaire, DHU FIRE, Paris, France ;

23 <sup>8</sup> Université Côte d'Azur, CNRS, IPMC, FHU-OncoAge, Valbonne, France

24 <sup>9</sup> CYU Université, ERRMECe(EA1391), NEUVILLE SUR OISE, France

25 <sup>10</sup> Secarna Pharmaceuticals GmbH & Co. KG – Planegg/Martinsried (Germany)

26 <sup>11</sup> Department of Internal Medicine II, University of Giessen-Marburg Lung Center, Justus-Liebig  
27 University Giessen, Giessen, Germany.

28  
29 \* Both authors equally contributed to this manuscript.

30 \$ corresponding author: Dr. Arnaud Mailleux, INSERM, U1152, 16 rue Henri Huchard 75018, Paris,  
31 France. E-mail: [arnaud.mailleux@inserm.fr](mailto:arnaud.mailleux@inserm.fr); Phone: (33)157277584; Fax: (33)157277551  
32

33  
34 "The authors have declared that no conflict of interest exists."  
35

## 36 37 Brief Summary

38 Inhibition of a single fibroblast-associated transcription factor, namely paired-related  
39 homeobox protein 1, is sufficient to dampen lung fibrogenesis.  
40  
41

42 Keywords: lung fibrosis, IPF, transcription factor, mesenchyme, fibroblast, bleomycin.  
43

44 **ABSTRACT:**

45

46 Matrix remodeling is a salient feature of idiopathic pulmonary fibrosis (IPF). Targeting  
47 cells driving matrix remodeling could be a promising avenue for IPF treatment. Analysis of  
48 transcriptomic database identified the mesenchymal transcription factor PRRX1 as  
49 upregulated in IPF.

50 PRRX1, strongly expressed by lung fibroblasts, was regulated by a TGF- $\beta$ /PGE2  
51 balance in vitro in control and IPF fibroblasts, while IPF fibroblast-derived matrix increased  
52 *PRRX1* expression in a PDGFR dependent manner in control ones.

53 PRRX1 inhibition decreased fibroblast proliferation by downregulating the expression  
54 of S phase cyclins. PRRX1 inhibition also impacted TGF- $\beta$  driven myofibroblastic  
55 differentiation by inhibiting SMAD2/3 phosphorylation through phosphatase PPM1A  
56 upregulation and TGFBR2 downregulation, leading to TGF- $\beta$  response global decrease.

57 Finally, targeted inhibition of *Prrx1* attenuated fibrotic remodeling in vivo with intra-  
58 tracheal antisense oligonucleotides in bleomycin mouse model of lung fibrosis and ex vivo  
59 using precision-cut lung slices.

60 Our results identified PRRX1 as a mesenchymal transcription factor driving lung  
61 fibrogenesis.

62

63

64

## 65 **INTRODUCTION:**

66 Chronic remodeling is a key feature of many Human diseases associated with aging. In  
67 particular, chronic respiratory diseases, including lung fibrosis, are a major and increasing  
68 burden in terms of morbidity and mortality <sup>1</sup>. For instance, idiopathic pulmonary fibrosis (IPF)  
69 is the most common form of pulmonary fibrosis. IPF is defined as a specific form of chronic,  
70 progressive fibrosing interstitial pneumonia of unknown cause. IPF patients have an overall  
71 median survival of 3 to 5 years <sup>1</sup>.

72 According to the current paradigm, IPF results from progressive alterations of alveolar  
73 epithelial cells leading to the recruitment of mesenchymal cells to the alveolar regions of the  
74 lung with secondary deposition of extracellular matrix, and destruction of the normal lung  
75 structure and physiology. IPF develops in a susceptible individual and is promoted by  
76 interaction with environmental agents such as inhaled particles, tobacco smoke, inhaled  
77 pollutants, viral and bacterial agents. Aging is probably both a susceptibility marker and a major  
78 driver of the disease, through mechanisms that are not yet fully elucidated. Two drugs  
79 (Pirfenidone and Nintedanib) appear to slow disease progression and may improve long term  
80 survival <sup>1</sup>.

81 In any given cell, a set of transcription factors is expressed and works in concert to govern  
82 cellular homeostasis and function. Dysregulation of transcriptional networks may therefore  
83 account to aberrant phenotypic changes observed in lung fibrosis. Among the multifaceted  
84 tissue cellular “ecosystem”, cells of mesenchymal origin such as fibroblasts are the main  
85 cellular components responsible for tissue remodeling during normal and pathological lung  
86 tissue repair <sup>1,2</sup>. Thus, targeting master transcription factors preferentially expressed in  
87 fibroblast could be a promising avenue for IPF treatment.

88 Using an in silico approach, we screened publicly available transcript microarray  
89 databases for expression of mesenchyme-associated transcription factors in control and IPF  
90 lung samples. We identified the “Paired Related Homeobox Protein-1” (*PRRX1*) gene as a  
91 potential candidate for transcriptional regulation differently modulated in IPF compared to  
92 control lungs. The *PRRX1* mRNA generates by alternative splicing two proteins, PRRX1a (216  
93 aa) and PRRX1b (245 aa) that differ at their C-terminal parts. Functional in vitro studies  
94 suggested that PRRX1a promoted transcriptional activation whereas PRRX1b may act rather  
95 as a transcriptional repressor <sup>3</sup>.

96 *Prrx1* is implicated in the regulation of mesenchymal cell fate during embryonic  
97 development. PRRX1 is essential for fetal development as *Prrx1*<sup>-/-</sup> mice present severe  
98 malformation of craniofacial, limb, and vertebral skeletal structures <sup>4</sup>. *Prrx1*<sup>-/-</sup> mice also display  
99 hypoplastic lungs with severe vascularization defects and die soon after birth <sup>5</sup>. PRRX1  
100 function is not restricted to embryogenesis. It has been also shown that PRRX1 was a  
101 stemness regulator <sup>6</sup>, involved in adipocyte differentiation <sup>7</sup>, epithelial tumor metastasis and

102 pancreatic regeneration<sup>8-10</sup> as well as liver fibrosis<sup>11</sup>. PRRX1 transcription factors are also at  
103 the center of the network coordinating dermal fibroblast differentiation<sup>12</sup>.

104 However, whether and how PRRX1 plays a role in lung fibrogenesis still remains elusive.  
105 Given its central position in fibroblast transcriptional network, we hypothesized that PRRX1  
106 transcription factors are important drivers of the fibroblast phenotype in IPF, promoting the  
107 development/progression of fibrosis.

108

109 **RESULTS:**

110 **Identification of *PRRX1* isoforms as mesenchymal transcription factors associated with**  
111 **IPF.**

112 Since mesenchymal cells are thought to be one of the major effector cells during fibrosis  
113 <sup>1,2</sup>, we sought to identify mesenchymal transcription factors associated with IPF in patients. We  
114 screened three curated publicly available transcript microarray databases from NCBI GEO  
115 (GDS1252, GDS4279, GDS3951) for transcription factor expression in IPF and control whole  
116 lung samples. Among the 210 common genes upregulated at the mRNA level in all three IPF  
117 lung datasets compared to their respective control ones (Figure 1a and supplemental Table  
118 S1), 12 genes were annotated as transcription factors (Figure 1a) after gene ontology analysis.  
119 One of these transcription factors, *PRRX1* appeared as an appealing candidate since this gene  
120 was previously associated with mesenchymal cell fate during embryogenesis <sup>4</sup> and is required  
121 for proper lung development <sup>5</sup>. In addition, *PRRX1* mRNA was upregulated in a fourth  
122 transcriptome dataset comparing “rapid” and “slow” progressor subgroups of IPF patients <sup>13</sup>.  
123 None of those transcriptome datasets discriminated *PRRX1* isoforms, namely *PRRX1a* and  
124 *PRRX1b*.

125 First, we confirmed that both *PRRX1* isoforms were upregulated in Human IPF lungs  
126 at the mRNA and protein levels (Figure 1a-c). Immunoblot revealed that PRRX1a protein (210  
127 aa) was the main PRRX1 isoform expressed in control and IPF lungs. We also investigated  
128 PRRX1 expression pattern by immunohistochemistry in control and IPF Human lung tissue  
129 sections (the antibody recognized both PRRX1 isoforms, see Figure 1d). Additional lineage  
130 markers were also investigated such as Vimentin (mesenchyme marker), ACTA2  
131 (myofibroblast / smooth muscle marker) and CD45 (hematopoietic lineage) as shown in  
132 supplemental Figure S1. PRRX1 positive cells were not detected in the distal alveolar space  
133 and in the bronchiolar epithelium of control lung (Figure 1d). Nevertheless, PRRX1 nuclear  
134 staining was observed in mesenchymal cells (Vimentin positive but ACTA2 and CD45 negative  
135 cells) within peri-vascular and peri-bronchiolar spaces (Figure 1d and supplemental Figure  
136 S1). In IPF patients, nuclear PRRX1 positive cells were mainly detected in the fibroblast foci  
137 (Figure 1d), which are the active sites of fibrogenesis <sup>1,2</sup>. Those PRRX1 positive cells were all  
138 Vimentine positive and CD45 negative but only some were expressing ACTA2 (supplemental  
139 Figure S1).

140 To confirm the identity of PRRX1 expressing cells in the lung as fibroblasts, we took  
141 advantage of recently published single-cell transcriptomic analysis performed using lung  
142 samples <sup>14,15</sup>. *PRRX1* mRNA expression was restricted to the fibroblast / mesenchymal cell  
143 lineages in either lung transplant donors or recipients with pulmonary fibrosis (Figure 2a and  
144 supplemental Figure S2).

145 In vitro, both isoforms, *PRRX1a* and *PRRX1b* mRNA were also found to be strongly expressed  
146 by primary lung fibroblasts compared to primary alveolar epithelial type 2 cells (AECII) and  
147 alveolar macrophages (Figure 2c) by quantitative PCR (qPCR). In addition, *PRRX1a* and *-1b*  
148 levels were increased in IPF primary lung fibroblasts compared to control ones only at the  
149 mRNA level as assayed by qPCR and western blot (Figure 2c-d). By immunofluorescence,  
150 PRRX1 was detected at the protein level in the nuclei of both control and IPF fibroblasts  
151 cultured in vitro (Figure 2e).

152

153 ***PRRX1* isoforms expression in primary lung fibroblasts is tightly regulated by growth**  
154 **factors and extracellular matrix stiffness *in vitro*.**

155 To better understand the regulation of PRRX1 isoforms in lung fibroblasts, we first  
156 assayed the effects of factors known to regulate lung fibroblast to myofibroblasts differentiation  
157 on the expression of both PRRX1 isoforms in control and IPF primary lung fibroblasts.  
158 “Transforming growth factor beta 1” (TGF- $\beta$ 1, 1ng/ml) treatment which triggers myofibroblastic  
159 differentiation<sup>2</sup> was associated with a decrease in the expression level of both *PRRX1* isoforms  
160 at the mRNA level (Figure 3a). This effect was confirmed at the protein level by western blot  
161 and immunofluorescence (supplemental Figure S3). Conversely, prostaglandin E<sub>2</sub> (PGE<sub>2</sub>,  
162 100nM) treatment which decreases myofibroblastic differentiation<sup>2</sup> was associated with an  
163 increase of *PRRX1* isoforms mRNA and protein in both control and IPF fibroblasts (Figure 3a  
164 and supplemental Figure S3). These data indicate that PRRX1 isoform expression is controlled  
165 by a TGF- $\beta$ /PGE<sub>2</sub> balance in lung fibroblasts.

166 Concomitantly with an aberrant growth factors/chemokine secretory profile, lung  
167 fibrosis is also characterized by local matrix stiffening, which plays a key role in IPF  
168 physiopathology<sup>16</sup>. Previous studies showed that increasing matrix stiffness strongly  
169 suppressed fibroblast expression of *PTGS2*<sup>17</sup>, a key enzyme in PGE<sub>2</sub> synthesis, and increased  
170 Rho kinase (ROCK) activity<sup>18</sup>, contributing to myofibroblastic differentiation. Control and IPF  
171 primary lung fibroblasts were cultured on fibronectin-coated glass (elastic/Young’s modulo in  
172 the GPa range) or hydrogel substrates of discrete stiffness, spanning the range of normal  
173 (1.5kPa) and fibrotic (28kPa) lung tissue<sup>16</sup>. We confirmed that soft (1.5kPa) substrate culture  
174 condition did increase *PTGS2* mRNA level compared to stiff/glass control condition in both  
175 control and IPF fibroblasts (data not shown). The expression levels of both *PRRX1* TFs  
176 isoforms mRNA were also increased on soft/normal 1.5kPa stiffness substrate (Figure 3b)  
177 compared to stiff substrates (Glass and 28kPa culture conditions). Treatment with NS398  
178 (10 $\mu$ g/ml), a specific *PTGS2* inhibitor abrogated the *PRRX1* TFs increase on soft substrate  
179 (Figure 3c). Conversely, inhibition of mechanosensitive signalling with Fasudil (35 $\mu$ M), an  
180 inhibitor of ROCK1 and ROCK2<sup>18</sup>, induced *PRRX1* TFs mRNA expression in both control and  
181 IPF fibroblasts grown on glass/stiff substrate (Figure 3c). Collectively, these data indicate that

182 PRRX1 expression is tightly controlled by extra-cellular matrix stiffness through a  
183 PTGS2/ROCK activity balance.

184

### 185 **IPF fibroblast-derived matrix increased PRRX1 expression in control fibroblasts in a** 186 **PDGFR dependent manner**

187 In order to better appreciate the regulation of PRRX1 expression in a complex environment,  
188 we cultured lung fibroblasts in a fibroblast-derived 3D ECM. Control and IPF fibroblasts were  
189 maintained in high-density culture to generate thick matrices that were extracted with detergent  
190 at alkaline pH to remove cellular contents (Figure 3d). This treatment leaves behind a 3D ECM  
191 that is intact and cell-free <sup>19</sup>.

192 We observed that *PRRX1a* and *-1b* TF mRNA expression was upregulated in control  
193 fibroblasts cultured on IPF fibroblast derived 3D ECM compared to plastic culture (Figure 3e).  
194 Meanwhile, *PRRX1a* and *-1b* mRNA expression levels were stable in IPF fibroblasts seeded  
195 either on control or IPF fibroblast derived 3D ECM compared to plastic culture (Figure 3e).

196 To better understand the cellular processes and signalling pathways involved, control  
197 fibroblasts seeded on IPF fibroblast-derived matrix were treated with two tyrosine kinase  
198 protein inhibitors, namely Imatinib (10µg/ml) and Nintedanib (10nM). Those tyrosine kinase  
199 inhibitors have anti-fibrotic properties on lung fibroblasts <sup>20</sup> and Nintedanib is one of the two  
200 drugs currently approved for IPF treatment<sup>1</sup>. Both inhibitors reverted the effect of IPF fibroblast-  
201 derived matrix upon *PRRX1a* and *PRRX1b* mRNA levels (Figure 3e). Interestingly, amongst  
202 their multiple targets <sup>1,2</sup>, Imatinib and Nintedanib are known to both inhibit PDGFR. Treatment  
203 with a specific PDGFR inhibitor (PDGFR V <sup>21</sup>) at the nanomolar range (10nM) did confirm the  
204 PDGFR-dependency of this effect of IPF fibroblast-derived ECM on *PRRX1a* and *-1b* mRNA  
205 levels in control fibroblasts (Figure 3e).

206

### 207 **PRRX1 TF isoforms promote fibroblast proliferation.**

208 Since PRRX1 expression is strongly associated with fibroblasts in IPF, we next  
209 investigated whether PRRX1 TFs may drive the phenotype of primary lung fibroblasts. The  
210 involvement of PRRX1 was studied in vitro by using siRNA targeting both *PRRX1a* and  
211 *PRRX1b* isoforms (loss of function).

212 First, we investigated the effects of *PRRX1* TFs knock down using two different siRNA  
213 sequences (see Figure 4a-b). Knockdown of *PRRX1* TFs significantly decreased primary lung  
214 fibroblast proliferation in complete growth medium after 72h (Figure 4c) as compared to the  
215 control siRNA. Cell cycle analysis revealed a significant decrease in S phase concomitantly  
216 with an increase in G1 phase, suggestive of a G1/S arrest in control and IPF lung fibroblasts  
217 treated with *PRRX1* siRNA (Figure 4d and supplemental Figure S4). This potential G1/S arrest  
218 was also associated with a strong decrease in *CCNA2* and *CCNE2* mRNA expression after 72

219 hours (Figure 4e). These two cyclins play a key role in the replicative S phase during the cell  
220 cycle<sup>22</sup>. To further characterize the impact of *PRRX1* TF inhibition on cell cycle progression,  
221 we performed a FACS analysis of KI67 expression in primary control and IPF lung fibroblasts  
222 transfected with *PRRX1* siRNA sequences for 72h compared to control siRNA. KI67 protein is  
223 usually present during all active phases of the cell cycle, but is absent from resting cells in G0  
224<sup>23</sup>. *PRRX1* inhibition strongly decreased the number of KI67 (MKI67; official name) positive  
225 cells in control and IPF lung fibroblasts (Figure 4f and supplemental Figure S4). Of note, *MKI67*  
226 expression was also decreased at the mRNA level in control and IPF lung fibroblasts treated  
227 with *PRRX1* siRNA (supplemental Figure S4). Next, we used a chromatin immunoprecipitation  
228 approach (ChIP) to assay a possible direct regulatory effect of PRRX1 upon *CCNA2*, *CCNE2*  
229 and *MKI67* gene loci in primary normal Human lung fibroblasts (NHLF). We observed an  
230 enrichment of PRRX1 binding at the vicinity of PRRX1 response element (*PRE*) identified in  
231 the *CCNA2*, *CCNE2* and *MKI67* promoter regions, suggesting that those genes could be direct  
232 PRRX1 TFs target genes. Meanwhile, no PRRX1 binding was detected at the *GAPDH*  
233 transcription starting site (TSS); devoid of *PRE* (Figure 4g).

234 We also assayed the effect of *PRRX1* knock down on the mRNA expression of *CDKN2A*  
235 (p16), *CDKN1A* (p21) and *TP53*, major negative regulators of cell cycle also associated with  
236 cellular senescence<sup>22</sup>. The expression of all three cell cycle inhibitors was increased only at  
237 the mRNA level in both control and IPF lung fibroblasts treated with *PRRX1* siRNA compared  
238 to control siRNA as assayed by qPCR and western blot (see supplemental Figure S4 and data  
239 not shown). This cell cycle arrest in control and IPF lung fibroblasts treated with *PRRX1* siRNA  
240 was not associated with an increase in  $\beta$ -Galactosidase activity, a senescence marker,  
241 compared to cells transfected with control siRNA (data not shown).

242 In conclusion, our results showed that PRRX1 controlled fibroblast proliferation in vitro.

243

#### 244 **PRRX1 TFs are required for the induction of alpha smooth muscle actin during TGF- $\beta$ 1-** 245 **driven myofibroblastic differentiation.**

246 Next, we investigated the effects of PRRX1 TFs partial loss of function on  
247 myofibroblastic differentiation in primary control and IPF lung fibroblasts. In an appropriate  
248 microenvironment, fibroblasts can differentiate by acquiring contractile properties (such as  
249 expression of alpha smooth muscle actin (*ACTA2*); gamma smooth muscle actin (*ACTG2*) and  
250 Transgelin (*TAGLN* / *SM22*) and becoming active producers of extracellular matrix (ECM)  
251 proteins (such as Collagen 1, COL1; Fibronectin, FN1; Tenascin C, TNC and Elastin, ELN).  
252 Aberrant activation of fibroblasts into myofibroblasts is thought to be a major driver of lung  
253 fibrogenesis<sup>1,2</sup>.

254 We evaluated the effects of PRRX1 modulation on the expression of myofibroblast  
255 markers such as *ACTA2*, *COL1* and *FN1* at basal condition. PRRX1 TF loss of functions did



256 not robustly modify the basal expression of these markers at the mRNA and proteins levels  
257 after 48h of treatment as assayed respectively by qPCR and western blot (supplemental Figure  
258 S5). Recently, *PRRX1* has been implicated in a positive feed-back loop in which *TWIST1*  
259 directly increased *PRRX1* which subsequently induced Tenascin-C that itself stimulated  
260 *TWIST1* activity in Cancer associated fibroblast (CAF), and in dermal and fetal Human lung  
261 fibroblast lines<sup>24</sup>. However, we observed that *PRRX1* inhibition with siRNA failed to modulate  
262 *TNC* and *TWIST1* mRNA levels in adult primary control and IPF lung fibroblasts at basal  
263 condition (supplemental Figure S5).

264 As mentioned before, TGF- $\beta$ 1 is a major regulator of myofibroblastic differentiation. We  
265 determined whether *PRRX1* TFs may regulate myofibroblastic differentiation upon TGF- $\beta$ 1  
266 stimulation. Control and IPF primary lung fibroblasts were first treated with *PRRX1* siRNA for  
267 48h and then stimulated with 1ng/ml TGF- $\beta$ 1 for 48h. The inhibition of *PRRX1* TFs impacted  
268 the upregulation of contractile-associated actin isoforms at the mRNA levels such as *ACTA2*  
269 ( $\alpha$ -SMA) and *ACTG2* ( $\gamma$ -SMA) in response to TGF- $\beta$ 1 stimulation (Figure 5a and supplemental  
270 Figure S6) while the expression of the actin binding protein *TAGLN* (*SM22*) was not perturbed  
271 (supplemental Figure S6). The effect of *PRRX1* inhibition upon *ACTA2* upregulation was  
272 confirmed at the protein level in both control and IPF fibroblasts (Figure 5b).

273 With respect to ECM synthesis, *PRRX1* knock down did not influence *FN1* or *COL1A1*  
274 upregulation after TGF- $\beta$ 1 stimulation, both at mRNA and protein levels (Supplemental Figure  
275 S6). Nevertheless, other ECM proteins associated with IPF were modulated after *PRRX1* down  
276 regulation in presence of TGF- $\beta$ 1. For instance, the expression of *TNC* mRNA was increased  
277 in *PRRX1* siRNA treated control and IPF lung fibroblasts compared to control siRNA treated  
278 in presence of TGF- $\beta$ 1 (supplemental Figure S6). Meanwhile, the expression of *ELN* mRNA  
279 was downregulated in IPF lung fibroblasts (supplemental Figure S6) after TGF- $\beta$ 1 stimulation.

280

281 ***PRRX1* TFs modulate SMAD2 and SMAD3 phosphorylation in response to TGF- $\beta$ 1 by**  
282 **regulating the expression of TGF $\beta$  Receptor 2 (*TGFBR2*) and the serine/ threonine**  
283 **phosphatase *PPM1A*.**

284 To better appreciate the *PRRX1* siRNA effects upon TGF- $\beta$ 1 pathway, whole  
285 transcriptome profiling was performed on NHLF treated with *PRRX1* or control siRNAs for 48h  
286 and then in presence or absence of TGF- $\beta$ 1 (for an additional 48h). Ingenuity Pathway Analysis  
287 at 96h indicated that the most significantly modulated pathway by *PRRX1* inhibition was the  
288 TGF- $\beta$ 1 pathway, which was significantly inhibited in TGF- $\beta$ 1-stimulated NHLF treated with  
289 *PRRX1* siRNA compared to control siRNA (Figure 5c, supplemental Figure S7 and  
290 supplemental Table S2).

291 Interestingly, *PRRX1* knockdown significantly affected the expression of the  
292 transmembrane Serine/Threonine kinase receptor *TGFBR2*, a key component of the TGF- $\beta$

293 pathway (Figure 5c and supplemental Figure S7). We confirmed this observation in control and  
294 IPF fibroblasts at mRNA and protein levels (Figure 5d and supplemental Figure S8). We  
295 performed a ChIP assay to investigate a possible interaction of PRRX1 TFs with *TGFBR2*  
296 gene promoter regions. However, we detected no enrichment in PRRX1 TF binding in *TGFBR2*  
297 promoter regions by ChIP in primary NHLF (data not shown).

298 TGFBR2 is part of the receptor complex with TGFBR1 controlling TGF- $\beta$ /SMAD  
299 signaling cascade by promoting SMAD2 and SMAD3 phosphorylation upon TGF- $\beta$ 1  
300 stimulation. We assayed SMAD2 and SMAD3 phosphorylation in control and IPF fibroblasts  
301 treated with *PRRX1* siRNA, compared to cells transfected with control siRNA, in presence or  
302 absence of TGF- $\beta$ 1 (30min stimulation) (Figure 5e). In control and IPF fibroblasts, PRRX1  
303 knock down strongly inhibited TGF- $\beta$ 1-induced SMAD2 and SMAD3 phosphorylation (Figure  
304 5e). Most importantly, *PRRX1* knock down did not inhibit the activation of non-  
305 canonical/SMAD-independent TGF- $\beta$  receptor-mediated signalling pathway such as AKT and  
306 JNK, in both control and IPF fibroblast (data not shown).

307 To understand this discrepancy between inhibition of SMAD2/3 phosphorylation and  
308 persistent activation of non-canonical pathways, we investigated whether PRRX1 TFs may  
309 regulate the expression of intracellular phosphatases known to control SMAD2 and SMAD3  
310 phosphorylation downstream of TGF- $\beta$  receptor activation<sup>25</sup>. We observed that *PRRX1* siRNA-  
311 mediated inhibition was associated with an increase of PPM1A, a phosphatase member of the  
312 PP2C protein family, at both mRNA and protein levels compared to control and IPF fibroblasts  
313 treated with control siRNA (Figure 5f and supplemental Figure S8). In addition, siRNA-  
314 mediated inhibition of *PPM1A* partially rescued SMAD3 phosphorylation levels after TGF- $\beta$ 1  
315 stimulation in *PRRX1* siRNA treated control and IPF fibroblasts (Figure 5F and supplemental  
316 Figure S8). Next, we performed a ChIP assay in primary NHLF to investigate a possible  
317 interaction of PRRX1 TFs with *PPM1A* gene *loci*. Indeed, we detected an enrichment in PRRX1  
318 TF binding in *PPM1A* promoter regions (supplemental Figure S8).

319 Altogether, our results suggested that PRRX1 TFs are required to achieve proper  
320 myofibroblastic differentiation upon TGF- $\beta$ 1 stimulation. The effect is at least partially mediated  
321 through the regulation of TGF $\beta$  receptor 2 and PPM1A phosphatase expression.

322

### 323 **PRRX1 TFs expression levels are upregulated in the bleomycin-induced model of lung** 324 **fibrosis.**

325 In the light of our in vitro results regarding PRRX1 fundamental role in the control of  
326 fibroblast proliferation and TGF- $\beta$ 1 responsiveness, we investigated whether alteration in  
327 PRRX1 expression may also contribute to fibrogenesis in the bleomycin-induced model of lung  
328 fibrosis (single intratracheal instillation<sup>26</sup>). In this model, the expression levels of both *Prrx1*  
329 isoforms mRNA were mainly increased during the fibrotic phase from day 7 compared to the

330 control PBS treated animals (Figure 6a). The upregulation of PRRX1 expression level was  
331 confirmed at the protein level only at day 14 during fibrosis phase peak (Figure 6b).

332 Similarly to control Human lungs, PRRX1 positive cells were detected only within the  
333 peri-vascular and peri-bronchiolar spaces in PBS control mice, while the distal alveolar space  
334 and the bronchiolar epithelium were devoid of PRRX1 staining as assayed by  
335 immunohistochemistry. Meanwhile, PRRX1 positive cells were detected in the remodeled  
336 fibrotic area of bleomycin treated animals at day 14 (Figure 6c). In summary, our results  
337 indicated that PRRX1 TFs upregulation was associated with fibrosis development in the  
338 bleomycin-induced model of lung fibrosis.

339

#### 340 **In vivo inhibition of PRRX1 dampens experimental lung fibrosis.**

341 Since *Prrx1* loss of function is associated with perinatal lethality in *Prrx1*<sup>-/-</sup> pups<sup>4,5,27</sup>,  
342 we sought first to evaluate *Prrx1* function during lung fibrosis using *Prrx1*<sup>+/-</sup> heterozygous mice.  
343 We observed that the loss of one *Prrx1* allele was not associated with any haploinsufficiency  
344 (supplemental Figure S9) and those *Prrx1*<sup>+/-</sup> heterozygous mice were not protected from lung  
345 fibrosis at day 14 after intratracheal instillation of bleomycin (supplemental Figure S9).

346 In order to evaluate the involvement of PRRX1 TFs in pulmonary fibrosis in vivo, we  
347 then chose to treat wild type mice with a third generation antisense LNA-modified  
348 oligonucleotide (ASO) targeting both *Prrx1* isoforms in the bleomycin-induced model of lung  
349 fibrosis. The control or *Prrx1* ASO were administrated during the fibrotic phase (from day 7 to  
350 13) by an endotracheal route to target specifically the lung. As compared to control ASO, *Prrx1*  
351 ASO strongly reduced the expression of both *Prrx1* isoforms at the mRNA and protein levels  
352 (Figure 7a-b) and reduced the extent of lung lesions on day 14 (Figure 7c). Lung collagen  
353 content was decreased as assessed with picrosirius staining, immunohistochemistry and  
354 hydroxyproline assay (Figure 7d-f). A similar decrease in ACTA2 staining was observed in  
355 *Prrx1* ASO treated animals at day 14 by immunohistochemistry (Figure 7e). In addition, *Prrx1*  
356 ASO decreased *Col1a1*,  *and *Acta2* mRNA content (Figure 8a) in *PRRX1* ASO treated  
357 bleomycin mice compared to control ASO treated ones. Finally, the expression levels of COL1,  
358 FN1 and ACTA2 were also decreased at the protein level as assayed by Western Blot (Figure  
359 8b-c). The dampened fibrosis development observed in *PRRX1* ASO treated bleomycin mice  
360 was also associated with a decrease in key fibrosis mediators such as *Tgfb1* and *Ctgf* as well  
361 as inflammatory markers as *Tnf* and *Serp1n-1* at the mRNA level (supplemental Figure S10).  
362 Furthermore, *Prrx1* was recently identified as the master transcription factor in the *Col14a1*  
363 subtype mesenchymal cell during fibrogenesis in this experimental model<sup>28</sup>. Interestingly, the  
364 expression of *Col14a1* mRNA was also strongly decreased in the *Prrx1* ASO treated animals  
365 compared to control ASO at day 14 as assayed by qPCR (supplemental Figure S10). With*

366 respect to another fibrosis-associated key ECM protein, *Tnc* mRNA level was also decreased  
367 in the *Prrx1* ASO treated bleomycin group (supplemental Figure S10).

368 The expression levels of the proliferation marker *Mki67* was decreased at the mRNA  
369 levels in the *Prrx1* ASO treated animals compared to control ASO at day 14 as assayed by  
370 qPCR (Figure 8d). A decrease in Ki67 positive cells was also observed by immunohistochemistry  
371 in the *Prrx1* ASO treated animal lungs after bleomycin challenge compared to control ASO  
372 ones at day 14 (Figure 8d).

373 These data demonstrate that PRRX1 targeting in the lung has the potential to inhibit  
374 lung fibrosis development.

375

### 376 **PRRX1 inhibition attenuates lung fibrosis in mouse and Human precision-cut lung** 377 **slices (PCLS).**

378 To confirm the effect of the *Prrx1* ASO in a second model of lung fibrosis, we took advantage  
379 of a well-established ex vivo model of lung fibrosis using precision-cut lung slices (PCLS)  
380 derived from mouse and Human lung samples<sup>29</sup>. PCLS have the major advantage to include  
381 the lung primary cell populations in a 3-dimensional preserved lung architecture and  
382 microenvironment. Our *Prrx1* ASO was designed to target both Human *PRRX1* and mouse  
383 *Prrx1* TFs orthologs. In basal condition, *Prrx1* knock down was associated with a decrease in  
384 *Acta2* mRNA expression in mouse PCLS (supplemental Figure S11). Next, mouse or Human  
385 control lung PCLS were treated with a fibrosis cytokine cocktail (FC) consisting of TGF- $\beta$ 1,  
386 PDGF-AB, TNF $\alpha$  and LPA to trigger fibrosis-like changes<sup>29</sup>. In both mouse and Human PCLS,  
387 *ACTA2*, *COL1A1* and *FN1* mRNA upregulation was lessened in FC-stimulated PCLS with  
388 *PRRX1* ASO compared to control (Figure 9a-c). We confirmed those findings at the protein  
389 levels for ACTA2 and COL1 by western blot in mouse PCLS (Figure 9b). In Human PCLS  
390 stimulated with FC, morphological analysis revealed that *PRRX1* ASO treatment was  
391 associated with a decreased Collagen accumulation compared to control ASO (Figure 9d).

392 Altogether, these results demonstrate that inhibition of PRRX1 transcription factors,  
393 using an ASO approach, reduced fibrosis development in vivo and ex vivo.

394

395 **DISCUSSION:**

396 This is the first study to evidence the critical role of the PRRX1 transcription factors in  
397 lung fibrosis pathophysiology. Our results demonstrate that 1) PRRX1 TFs are upregulated in  
398 mesenchymal cells accumulating in the fibrotic areas of IPF lungs, 2) the expression of PRRX1  
399 TFs is positively regulated by cues associated with an undifferentiated phenotype in control  
400 and IPF primary lung fibroblasts, 3) PRRX1 TFs are required for proliferation as well as proper  
401 myofibroblastic differentiation in vitro (see Figure 10 for summary). We identified the underlying  
402 mechanisms; including PRRX1 TFs effects on cell cycle (modulation of cyclins and MKI67)  
403 and on SMAD 2/3 phosphorylation (regulation of TGFBR2 and phosphatase PPM1A)  
404 respectively (see Figure 10). Finally, inhibition of *Prrx1* with LNA-modified ASO strongly  
405 impacted lung fibrosis development in in vivo and ex vivo preclinical models.

406

407 **Reactivation of the developmental and mesenchyme-associated PRRX1 transcription**  
408 **factors in IPF.**

409 The *Prrx1* gene encodes transcription factor isoforms (*Prrx1a* and *1b*) involved in the  
410 maintenance of cell fate within the limb and craniofacial mesenchyme during ontogeny<sup>4</sup>. *Prrx1*  
411 is also required for cell fate decision during lung development. *Prrx1*<sup>-/-</sup> newborn display  
412 hypoplastic lungs and die at birth from respiratory distress<sup>5</sup>. PRRX1 TFs were also identified  
413 as key drivers of mesenchymal phenotype acquisition during epithelial-mesenchyme transition  
414 (EMT) in cancer<sup>8</sup>. A *Prrx1* positive fibroblast subpopulation was also recently characterized  
415 as pro-fibrotic in the mouse ventral dermis<sup>30,31</sup>. Interestingly, *Prrx1* mRNA expression was  
416 associated with a sub-population of matrix fibroblast in the bleomycin experimental mouse  
417 model of lung fibrosis using single-cell RNA sequencing<sup>28</sup>.

418 However, the role of PRRX1 TFs in IPF, a disease associated with major perturbations  
419 in mesenchymal compartment was not known. We first identified *PRRX1* as potentially  
420 upregulated TF in IPF lung after analysis of public transcriptomic database comparing control  
421 and IPF lungs<sup>32-34</sup>. *PRRX1* also appeared in the upregulated gene hit list of a subgroup of IPF  
422 patients, displaying an accelerated clinical course in another transcriptomic study<sup>13</sup>. We  
423 confirmed that the mRNA levels of *PRRX1* TFs isoforms were actually increased in IPF lung  
424 patients as well as in primary fibroblast isolated from IPF lung compared to control ones. This  
425 increase was confirmed at the protein level in IPF whole lung extracts compared to control  
426 ones. The upregulation of PRRX1 protein levels in fibrotic lungs may therefore reflect the  
427 accumulation of PRRX1 positive cells in IPF. Indeed, PRRX1 expression was restricted in  
428 control lungs to interstitial fibroblasts within peri-vascular and peri- bronchiolar space. In IPF  
429 lungs, PRRX1 was strongly detected in the nucleus of fibroblasts organized in foci as also  
430 observed by others<sup>24</sup> and in scattered mesenchymal cells within the remodeled / fibrotic lung

431 areas. Our findings are also supported by recent single cell transcriptomic studies performed  
432 in donor and fibrotic lungs <sup>14,15</sup>. Datamining from these studies confirmed that *PRRX1* TF  
433 expression was restricted to lung mesenchymal lineage.

434

435 ***PRRX1* TFs expression is increased in lung fibroblasts by cues promoting an**  
436 **undifferentiated state.**

437 Our data suggest that *PRRX1* expression is controlled by a PGE2/TGF- $\beta$  balance in  
438 lung fibroblasts in vitro.

439 On one hand, PGE2 up-regulated *PRRX1a* and *1b* expression in both control and IPF  
440 fibroblasts. Substrate stiffness in physiological range also increased *PRRX1* isoforms  
441 expression in a PTGS2 dependent manner. The PTGS2/PGE2 axis is known to promote an  
442 undifferentiated state in fibroblasts <sup>17</sup>. On the other hand, signals triggering myofibroblastic  
443 differentiation (TGF- $\beta$ 1 stimulation and stiff substrate) decreased *PRRX1* TFs levels in primary  
444 lung fibroblasts (Figure 10). Interestingly, several studies reported that *PRRX1* expression  
445 level was rather increased upon the activation of the TGF- $\beta$  pathway in other cell types such  
446 as mouse embryonic lung mesenchymal cells <sup>35</sup>, embryonic mouse 3T3-L1 adipocyte  
447 precursor <sup>7</sup> and transformed epithelial cells undergoing EMT <sup>8</sup>. *PRRX1* upregulation in  
448 response to TGF- $\beta$ 1 in the two later cell types promoted their dedifferentiation toward a more  
449 plastic phenotype <sup>7,8</sup>. Conversely, *PRRX1* downregulation in primary lung fibroblasts grown in  
450 presence of TGF- $\beta$ 1 was associated with a differentiation process toward myofibroblastic  
451 phenotype.

452 Overall, these different studies and our results strongly suggested that *PRRX1*  
453 expression is associated with an undifferentiated phenotype. In addition, *PRRX1a* and *-1b* TF  
454 mRNA expression levels were upregulated only in control fibroblasts seeded on IPF fibroblast-  
455 derived 3D ECM in a PDGFR dependent manner. *PRRX1* TF mRNA levels seemed to be  
456 regulated by both ECM origin and stiffness in control fibroblasts, while it was only modulated  
457 by the latter in IPF fibroblasts.

458

459 ***PRRX1* TFs drive key basic fibroblast functions involved in fibrogenesis.**

460 In adult lung fibroblasts, *PRRX1* TFs appeared to strongly influence cell cycle  
461 progression and myofibroblastic differentiation, two entangled cellular processes (Figure 10).  
462 There was generally no difference between control and IPF fibroblasts regarding *PRRX1*  
463 functions in those cells (with respect to proliferation and myofibroblastic differentiation at least).  
464 Overall, this may suggest that *PRRX1* TFs function might be central to fibroblast biology  
465 independently of their origin (control versus IPF lungs). However, differential *PRRX1* regulation

466 between control and IPF fibroblasts by the micro-environment or soluble factors could  
467 therefore have a higher impact on PRRX1 overall function in lung fibroblasts.

468 While PRRX1 TFs are required for fibroblast proliferation in complete growth medium,  
469 PRRX1 partial loss of function perturbed only some key features of myofibroblastic  
470 differentiation in response to TGF- $\beta$ 1 stimulation (see Figure 10). Only the expression of  
471 markers involved in the acquisition of contractile properties (*ACTA2* and *ACTG2*) was  
472 decreased in a SMAD2/3 dependent way. The effect of PRRX1 inhibition upon P-SMAD3 was  
473 partially mediated through TGFBR2 downregulation and the upregulation of the PPM1A  
474 phosphatase<sup>25</sup>, which are critical components of the canonical TGF- $\beta$ /SMAD signalling  
475 cascade. Whole transcriptome profiling data performed in NHLF were also consistent with a  
476 global impact of *PRRX1* downregulation on TGF- $\beta$  response in lung fibroblasts.

477 Meanwhile, the expression levels of key ECM proteins such as Collagen 1 and  
478 Fibronectin were still upregulated in TGF- $\beta$ 1 stimulated lung fibroblasts, transfected with  
479 *PRRX1* siRNA. Even though, SMAD3 phosphorylation was impacted, the non-canonical ERK,  
480 AKT and JNK pathways were still fully activated in those stimulated cells. The activation of  
481 those pathways has been previously showed to be sufficient to upregulate the expression of  
482 FN1 and Collagen 1 in fibroblasts<sup>2,25</sup>. However, the expression of other IPF-associated ECM  
483 proteins such as TNC and ELN was perturbed in *PRRX1* siRNA treated control and IPF lung  
484 fibroblasts stimulated with TGF- $\beta$ 1. Our results suggest that PRRX1 inhibition in presence of  
485 TGF- $\beta$ 1 might promote a different myofibroblastic phenotype with potentially less contractile  
486 capability and with a different ECM secretome.

487 Albeit we showed that PRRX1 is required for proper myofibroblastic differentiation, the  
488 expression of both PRRX1 isoforms was decreased after TGF- $\beta$ 1 treatment for 48h. This  
489 paradoxical downregulation of PRRX1 in response to TGF- $\beta$ 1, could be the signature of a  
490 negative feedback loop to limit cell-responsiveness to TGF- $\beta$ 1 long exposure (Figure 10). TGF-  
491  $\beta$ 1 induced PRRX1 inhibition in lung fibroblasts could also correlate with progressive  
492 proliferation loss during the differentiation process.

493 Overall, we propose that PRRX1 TFs would maintain lung mesenchymal cells in an  
494 undifferentiated and proliferative state but would also act as enablers to promote full  
495 myofibroblastic differentiation in response to pro-fibrotic cues such as TGF- $\beta$ 1.

496  
497 **Inhibition of the mesenchymal PRRX1 transcription factor is sufficient to dampen lung**  
498 **fibrosis in vivo.**

499 PRRX1 TFs expression levels were also upregulated during the fibrosis phase at day  
500 14 in mice treated with bleomycin (intratracheal route). However, the *Prrx1* homozygous and  
501 heterozygous mice were not suitable for studying *Prrx1* function during lung fibrosis in adult

502 mice. Indeed, *Prrx1*<sup>-/-</sup> mice present a lethal respiratory failure at birth <sup>4,5,27</sup> and the lack of  
503 haploinsufficiency in *Prrx1*<sup>+/-</sup> heterozygous mice did not prevent lung fibrosis development after  
504 intratracheal instillation of bleomycin. Thus, we chose to inhibit *Prrx1* in adult mice using a  
505 LNA-modified ASO <sup>36</sup> targeting both *Prrx1* isoforms. This ASO was administered by the  
506 endotracheal route in a “curative” protocol from day 7 in this experimental mouse model of  
507 pulmonary fibrosis. LNA-modified ASOs are protected from nuclease-mediated degradation,  
508 which significantly improves their stability and prolongs their activity in vivo. In comparison to  
509 earlier generations of ASO modifications, they have a massively increased affinity to their  
510 target RNA and their in vitro and in vivo activity does not depend on delivery reagents <sup>36</sup>. As a  
511 proof of concept, we confirmed that intratracheal administration of *Prrx1*-specific ASO inhibited  
512 the upregulation of mouse PRRX1a and -1b expression at both mRNA and protein level at day  
513 14 in bleomycin treated mice. Pulmonary fibrosis development was also reduced in these  
514 animals. While our in vitro findings in adult Human lung fibroblasts showed that PRRX1  
515 inhibition mainly impacted ACTA2 expression levels, *Prrx1* ASO treatment in the bleomycin  
516 mouse model of lung fibrosis also inhibited the deposition of Collagen and Fibronectin. This  
517 difference regarding ECM compound at day 14 may reflect the effect of *Prrx1* ASO on the  
518 overall fibrosis development; upon the proliferation / accumulation as well as impaired  
519 myofibroblastic differentiation of mesenchymal cells in vivo from the beginning of the ASO  
520 treatment at day 7. We confirmed the anti-fibrotic effect of the *Prrx1* ASO in a second model  
521 of fibrosis using ex vivo culture of Human or mouse PCLS stimulated with a cocktail of fibrosis-  
522 associated cytokines <sup>29</sup>.

523 Targeting of others transcription factors such as GLI <sup>26</sup>, FOXM1 <sup>37</sup>, FOXF1 <sup>38</sup>, FOXO3  
524 <sup>39</sup> and TBX4 <sup>40</sup> was also shown to inhibit fibrosis development in this mouse experimental  
525 model of pulmonary fibrosis. However, at the exception of TBX4 and PRRX1, the expression  
526 of all these other TFs is not restricted to mesenchymal lineages, which means that targeting  
527 those TFs may impact both lung fibrosis and epithelial regeneration/repair. Finally, PRRX1  
528 inhibition as a potential therapeutic approach in fibrosis is not restricted to the lung. Recently,  
529 adenoviral shRNA mediated inhibition of *Prrx1* in the thioacetamide model of liver fibrosis in  
530 rats also decreased fibrotic lesions, collagen deposition and hepatic stellate cells  
531 myofibroblastic differentiation <sup>11</sup>.

532 In conclusion, our study unveils the role of the pro-fibrotic and mesenchyme associated  
533 PRRX1 TFs in lung fibrosis by controlling fibroblasts proliferation and TGF- $\beta$  pathway  
534 responsiveness during myofibroblastic differentiation. Direct inhibition of PRRX1  
535 transcriptional activity in mesenchymal cells may be a potential therapeutic target in IPF.  
536 Furthermore, the effectiveness of the late administration of *Prrx1* ASO in the bleomycin model  
537 of pulmonary fibrosis is particularly interesting. The route of administration we used constitutes  
538 a first attempt to locally inhibit a pro-fibrotic TF. The possibility of a local administration of an



539 antifibrotic is seductive: current antifibrotics, administered systemically, are burdened with  
540 significant adverse events, which significantly attenuates their effect on health-related quality  
541 of life <sup>41</sup>. Inhaled pirfenidone and other inhaled compounds <sup>42</sup> are currently investigated in IPF,  
542 but none are directly acting on a mesenchymal transcription factor. Although already proved  
543 effective in asthma <sup>43</sup>, local transcription factor inhibition has never been investigated in IPF so  
544 far.  
545  
546

547 **METHODS:**

548

549 **Human lung samples.**

550 IPF lung samples were obtained from patients undergoing open lung biopsy or at the time of  
551 lung transplantation ( $n = 39$ ; median age 61 yr; range 51–70 yr). IPF was diagnosed according  
552 to 2011 ATS/ERS/JRS/ALAT criteria, including histopathological features of usual interstitial  
553 pneumonia<sup>44</sup>. Lung samples obtained after cancer surgery, away from the tumor, were used  
554 as controls; normalcy of control lungs was verified histologically ( $n = 35$  patients; median age  
555 64 yr, range 28–83 yr).

556

557 **In vivo experiments.**

558 All experiments were performed using adult male C57BL/6 mice and intratracheal bleomycin  
559 administration, as previously described<sup>26</sup>. To investigate the involvement of PRRX1 in  
560 fibrogenesis, mice were treated with third generation locked nucleic acid (LNA)-modified ASO  
561 targeting PRRX1 designed by Secarna Pharmaceuticals GmbH & Co, Planegg/Martinsried,  
562 Germany. The following sequence was used (+ indicates an LNA modification, while \* indicates  
563 a phosphorothioate (PTO) linkage) to target *Prrx1* (*Prrx1* ASO):

564 +T\*C\*+A\*+G\*G\*T\*T\*G\*G\*C\*A\*A\*T\*G\*+C\*+T\*+G

565 A previously published and validated<sup>45</sup> negative control ASO (Cont ASO) was used:

566 +C\*+G\*+T\*T\*T\*A\*G\*G\*C\*T\*A\*T\*G\*T\*A\*+C\*+T\*+T

567 Bleomycin control mice received only PBS. ASO and PBS were given by endotracheal  
568 instillation every other day from Day 7 after the bleomycin injection, until Day 14. All the mice  
569 were under isoflurane anesthesia during the instillation and received one injection every other  
570 day of 25 $\mu$ L with 20nmoles of ASO or PBS 1X. Lungs were harvested on Day 14 for further  
571 analysis. Hematoxylin, eosin and picosirius staining were performed routinely to evaluate the  
572 morphology of the lung. Semiquantitative histological assessment of lung injury used the  
573 grading system described by Inoshima and colleagues<sup>46</sup>. Total mRNA was extracted from  
574 mouse lung homogenates, and the expression of the genes of interest was quantified by real-  
575 time PCR, as previously described. Proteins were extracted from mouse lung homogenates  
576 and western blotting was performed by standard techniques as previously described<sup>26</sup>.

577 The *Prrx1* heterozygous mouse strain (129S-*Prrx1*<sup>tm1Jfm</sup>/Mmmh<sup>27</sup>, RRID:MMRRC\_000347-  
578 MU) was obtained from the Mutant Mouse Resource and Research Center (MMRRC) at  
579 University of Missouri (USA), an NIH-funded strain repository, and was donated to the MMRRC  
580 by Pr James Martin (Texas Agricultural and Mechanical University: Health Science Center,  
581 USA).

582

583 **Statistical Analysis.**

584 Most data are represented as dot plots with median, unless specified. All statistical analysis  
585 were performed using Prism 5 (GraphPad Software, La Jolla, CA). We used non-parametric  
586 Mann-Whitney U test for comparison between two experimental conditions. Paired data were  
587 compared with Wilcoxon signed-rank test. We used non-parametric Kruskal Wallis test  
588 followed by Dunn's comparison test for group analysis. Comparison of histological scores on  
589 Day 14 was performed with Fisher's exact test. A p-value < 0.05 was considered to be  
590 statistically significant. Exact *P* values and definition and number of replicates are given in the  
591 respective figure legend.

592

593 **Study approval.**

594 The study on human material was performed in accordance with the Declaration of Helsinki  
595 and approved by the local ethics committee (CPP Ile de France 1, No.0811760). Written  
596 informed consent was obtained from all subjects.

597 All animal experiments were conducted in accordance with the Directive 2010/63/EU of the  
598 European Parliament and approved by the local Animal ethics committee ("Comité d'éthique  
599 Paris Nord n°121", APAFiS #4778 Etudedufacteurdetran\_2016031617411315).

600

601

602 See supplementary materials for further details.

603

604 **Author contributions:**

605  
606 EMD, MHL, AF, MJ, EF, MG, AJ, AM, AJ, AAM, LG, AV, MK, CMM carried out the experiments;  
607 KS and FJ designed and provided reagents; AC, HM, PM provided the lung samples; AAM,  
608 BC supervised the study. AAM, BC, MHL, AF, CMM, AG, BM and EMD designed the work,  
609 analyzed the data and wrote the manuscript. All authors reviewed and approved the  
610 manuscript.

611

612

613 **Acknowledgements:**

614

615 We thank Olivier Thibaudeau and Laure Wingertsman (Morphology Platform, Inserm U1152  
616 of X. Bichat Medical School, Paris) for their efficient collaboration and the Flow Cytometry  
617 Platform of Inserm U1149 (CRI, X. Bichat Medical School, Paris) as well. We also thank Dr.  
618 J.W. Duitman (Academic Medical Center, Amsterdam, The Netherlands) for his technical help.  
619 This work was supported by the ANR (JCJC ANR-16-CE14-0018), by grants from the  
620 Chancellery of Paris Universities (Poix Legacy), and by the “Association pour la fibrose  
621 pulmonaire idiopathique Pierre ENJALRAN”. E. Marchal-Duval was supported by “Ecole  
622 Doctorale Bio-SPC” (Grant 2015) ; A. Froidure an European Respiratory Society (ERS) and  
623 the European Molecular Biology Organization (EMBO) - ERS-LTRF 2015 – 4476 and by a  
624 fellowship from the Belgian Society for Pulmonology (BVP-SBP); M Homps-Legrand by the  
625 Fond de dotation “Recherche en Santé Respiratoire” (Grant 2018). A. Justet by the “Fondation  
626 Recherche Médicale” (Grant FRM 2016, FDM41320); M. Ghanem by the Fond de dotation  
627 “Recherche en Santé Respiratoire” (Grant 2015) and A Maurac by the ARS Lorraine (« année  
628 Recherche » 2016). We thank Alberto Baeri (IPMC), Nicolas Nottet (C3M, Nice) and Kevin  
629 Lebrigand (UCA genomics platform, IPMC) for their technical help. The authors declare no  
630 conflicts of interest.

631

632 **REFERENCES:**

- 633 1. Martinez, F. J. *et al.* Idiopathic pulmonary fibrosis. *Nat. Rev. Dis. Primer* **3**, 17074  
634 (2017).
- 635 2. Fernandez, I. E. & Eickelberg, O. New cellular and molecular mechanisms of lung  
636 injury and fibrosis in idiopathic pulmonary fibrosis. *Lancet Lond. Engl.* **380**, 680–688 (2012).
- 637 3. Norris, R. A. & Kern, M. J. The identification of Prx1 transcription regulatory  
638 domains provides a mechanism for unequal compensation by the Prx1 and Prx2 loci. *J. Biol.*  
639 *Chem.* **276**, 26829–26837 (2001).
- 640 4. Martin, J. F., Bradley, A. & Olson, E. N. The paired-like homeo box gene MHox is  
641 required for early events of skeletogenesis in multiple lineages. *Genes Dev.* **9**, 1237–1249  
642 (1995).
- 643 5. Ihida-Stansbury, K. *et al.* Paired-related homeobox gene Prx1 is required for  
644 pulmonary vascular development. *Circ. Res.* **94**, 1507–1514 (2004).
- 645 6. Shimosaki, K., Clemenson, G. D. & Gage, F. H. Paired related homeobox protein 1 is  
646 a regulator of stemness in adult neural stem/progenitor cells. *J. Neurosci. Off. J. Soc.*  
647 *Neurosci.* **33**, 4066–4075 (2013).
- 648 7. Du, B. *et al.* The transcription factor paired-related homeobox 1 (Prrx1) inhibits  
649 adipogenesis by activating transforming growth factor- $\beta$  (TGF $\beta$ ) signaling. *J. Biol. Chem.*  
650 **288**, 3036–3047 (2013).
- 651 8. Ocaña, O. H. *et al.* Metastatic colonization requires the repression of the epithelial-  
652 mesenchymal transition inducer Prrx1. *Cancer Cell* **22**, 709–724 (2012).
- 653 9. Fazilaty, H. *et al.* A gene regulatory network to control EMT programs in  
654 development and disease. *Nat. Commun.* **10**, 5115 (2019).
- 655 10. Reichert, M. *et al.* The Prrx1 homeodomain transcription factor plays a central role in  
656 pancreatic regeneration and carcinogenesis. *Genes Dev.* **27**, 288–300 (2013).
- 657 11. Gong, J. *et al.* Paired related homeobox protein 1 regulates PDGF-induced chemotaxis  
658 of hepatic stellate cells in liver fibrosis. *Lab. Investig. J. Tech. Methods Pathol.* **97**, 1020–  
659 1032 (2017).
- 660 12. Tomaru, Y. *et al.* A transient disruption of fibroblastic transcriptional regulatory  
661 network facilitates trans-differentiation. *Nucleic Acids Res.* **42**, 8905–8913 (2014).
- 662 13. Selman, M. *et al.* Accelerated variant of idiopathic pulmonary fibrosis: clinical  
663 behavior and gene expression pattern. *PloS One* **2**, e482 (2007).
- 664 14. Reyfman, P. A. *et al.* Single-Cell Transcriptomic Analysis of Human Lung Provides  
665 Insights into the Pathobiology of Pulmonary Fibrosis. *Am. J. Respir. Crit. Care Med.* (2018)  
666 doi:10.1164/rccm.201712-2410OC.
- 667 15. Adams, T. S. *et al.* Single-cell RNA-seq reveals ectopic and aberrant lung-resident cell  
668 populations in idiopathic pulmonary fibrosis. *Sci. Adv.* **6**, eaba1983 (2020).
- 669 16. Booth, A. J. *et al.* Acellular normal and fibrotic human lung matrices as a culture  
670 system for in vitro investigation. *Am. J. Respir. Crit. Care Med.* **186**, 866–876 (2012).
- 671 17. Liu, F. *et al.* Feedback amplification of fibrosis through matrix stiffening and COX-2  
672 suppression. *J. Cell Biol.* **190**, 693–706 (2010).
- 673 18. Zhou, Y. *et al.* Inhibition of mechanosensitive signaling in myofibroblasts ameliorates  
674 experimental pulmonary fibrosis. *J. Clin. Invest.* **123**, 1096–1108 (2013).
- 675 19. Castelló-Cros, R. & Cukierman, E. Stromagenesis during tumorigenesis:  
676 characterization of tumor-associated fibroblasts and stroma-derived 3D matrices. *Methods*  
677 *Mol. Biol. Clifton NJ* **522**, 275–305 (2009).
- 678 20. Grimminger, F., Günther, A. & Vancheri, C. The role of tyrosine kinases in the  
679 pathogenesis of idiopathic pulmonary fibrosis. *Eur. Respir. J.* **45**, 1426–1433 (2015).
- 680 21. Furuta, T. *et al.* Identification of potent and selective inhibitors of PDGF receptor  
681 autophosphorylation. *J. Med. Chem.* **49**, 2186–2192 (2006).

- 682 22. Lim, S. & Kaldis, P. Cdks, cyclins and CKIs: roles beyond cell cycle regulation. *Dev.*  
683 *Camb. Engl.* **140**, 3079–3093 (2013).
- 684 23. Sobcecki, M. *et al.* Cell-Cycle Regulation Accounts for Variability in Ki-67 Expression  
685 Levels. *Cancer Res.* **77**, 2722–2734 (2017).
- 686 24. Yeo, S.-Y. *et al.* A positive feedback loop bi-stably activates fibroblasts. *Nat.*  
687 *Commun.* **9**, 3016 (2018).
- 688 25. Bruce, D. L. & Sapkota, G. P. Phosphatases in SMAD regulation. *FEBS Lett.* **586**,  
689 1897–1905 (2012).
- 690 26. Moshai, E. F. *et al.* Targeting the hedgehog-glioma-associated oncogene homolog  
691 pathway inhibits bleomycin-induced lung fibrosis in mice. *Am. J. Respir. Cell Mol. Biol.* **51**,  
692 11–25 (2014).
- 693 27. Lu, M. F. *et al.* prx-1 functions cooperatively with another paired-related homeobox  
694 gene, prx-2, to maintain cell fates within the craniofacial mesenchyme. *Dev. Camb. Engl.* **126**,  
695 495–504 (1999).
- 696 28. Xie, T. *et al.* Single-Cell Deconvolution of Fibroblast Heterogeneity in Mouse  
697 Pulmonary Fibrosis. *Cell Rep.* **22**, 3625–3640 (2018).
- 698 29. Lehmann, M. *et al.* Differential effects of Nintedanib and Pirfenidone on lung alveolar  
699 epithelial cell function in ex vivo murine and human lung tissue cultures of pulmonary  
700 fibrosis. *Respir. Res.* **19**, 175 (2018).
- 701 30. Leavitt, T. *et al.* Prrx1 Fibroblasts Represent a Pro-fibrotic Lineage in the Mouse  
702 Ventral Dermis. *Cell Rep.* **33**, 108356 (2020).
- 703 31. Currie, J. D. *et al.* The Prrx1 limb enhancer marks an adult subpopulation of injury-  
704 responsive dermal fibroblasts. *Biol. Open* **8**, (2019).
- 705 32. Cho, J.-H. *et al.* Systems biology of interstitial lung diseases: integration of mRNA  
706 and microRNA expression changes. *BMC Med. Genomics* **4**, 8 (2011).
- 707 33. Meltzer, E. B. *et al.* Bayesian probit regression model for the diagnosis of pulmonary  
708 fibrosis: proof-of-principle. *BMC Med. Genomics* **4**, 70 (2011).
- 709 34. Wang, X. M. *et al.* Caveolin-1: a critical regulator of lung fibrosis in idiopathic  
710 pulmonary fibrosis. *J. Exp. Med.* **203**, 2895–2906 (2006).
- 711 35. Li, A. *et al.* Mesodermal ALK5 controls lung myofibroblast versus lipofibroblast cell  
712 fate. *BMC Biol.* **14**, 19 (2016).
- 713 36. Soifer, H. S. *et al.* Silencing of gene expression by gymnotic delivery of antisense  
714 oligonucleotides. *Methods Mol. Biol. Clifton NJ* **815**, 333–346 (2012).
- 715 37. Penke, L. R. *et al.* FOXM1 is a critical driver of lung fibroblast activation and  
716 fibrogenesis. *J. Clin. Invest.* **128**, 2389–2405 (2018).
- 717 38. Black, M. *et al.* FOXF1 Inhibits Pulmonary Fibrosis by Preventing CDH2-CDH11  
718 Cadherin Switch in Myofibroblasts. *Cell Rep.* **23**, 442–458 (2018).
- 719 39. Al-Tamari, H. M. *et al.* FoxO3 an important player in fibrogenesis and therapeutic  
720 target for idiopathic pulmonary fibrosis. *EMBO Mol. Med.* **10**, 276–293 (2018).
- 721 40. Xie, T. *et al.* Transcription factor TBX4 regulates myofibroblast accumulation and  
722 lung fibrosis. *J. Clin. Invest.* **126**, 3063–3079 (2016).
- 723 41. Graney, B. A. & Lee, J. S. Impact of novel antifibrotic therapy on patient outcomes in  
724 idiopathic pulmonary fibrosis: patient selection and perspectives. *Patient Relat. Outcome*  
725 *Meas.* **9**, 321–328 (2018).
- 726 42. Kaminskas, L. M. *et al.* Aerosol Pirfenidone Pharmacokinetics after Inhaled Delivery  
727 in Sheep: a Viable Approach to Treating Idiopathic Pulmonary Fibrosis. *Pharm. Res.* **37**, 3  
728 (2019).
- 729 43. Krug, N. *et al.* Allergen-induced asthmatic responses modified by a GATA3-specific  
730 DNase. *N. Engl. J. Med.* **372**, 1987–1995 (2015).
- 731 44. Raghu, G. *et al.* An official ATS/ERS/JRS/ALAT statement: idiopathic pulmonary

- 732 fibrosis: evidence-based guidelines for diagnosis and management. *Am J Respir Crit Care*  
733 *Med* **183**, 788–824 (2011).
- 734 45. Jaschinski, F., Korhonen, H. & Janicot, M. Design and Selection of Antisense  
735 Oligonucleotides Targeting Transforming Growth Factor Beta (TGF- $\beta$ ) Isoform mRNAs for  
736 the Treatment of Solid Tumors. *Methods Mol. Biol. Clifton NJ* **1317**, 137–151 (2015).
- 737 46. Inoshima, I. *et al.* Anti-monocyte chemoattractant protein-1 gene therapy attenuates  
738 pulmonary fibrosis in mice. *Am. J. Physiol. Lung Cell. Mol. Physiol.* **286**, L1038-1044 (2004).  
739

740 **FIGURES:**

741



**a**

Upregulated genes in IPF transcriptome GeoDatasets

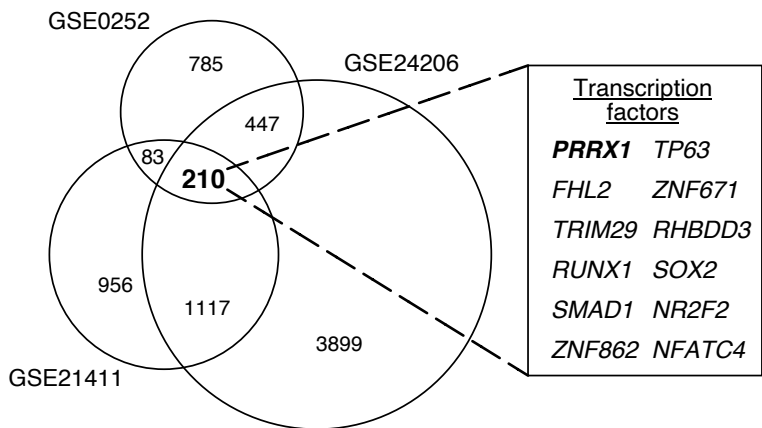

**b**

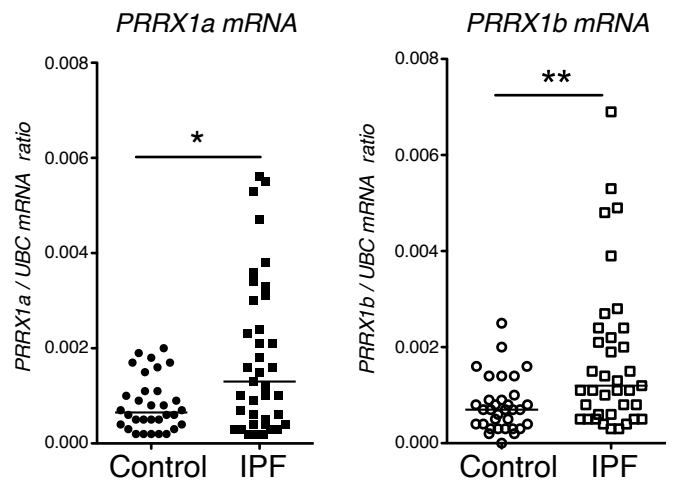

**c**

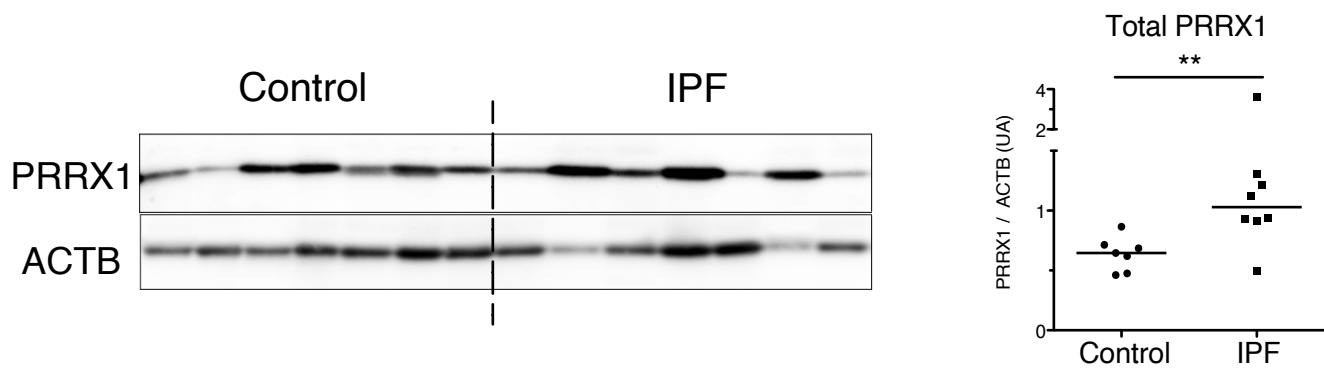

**d**

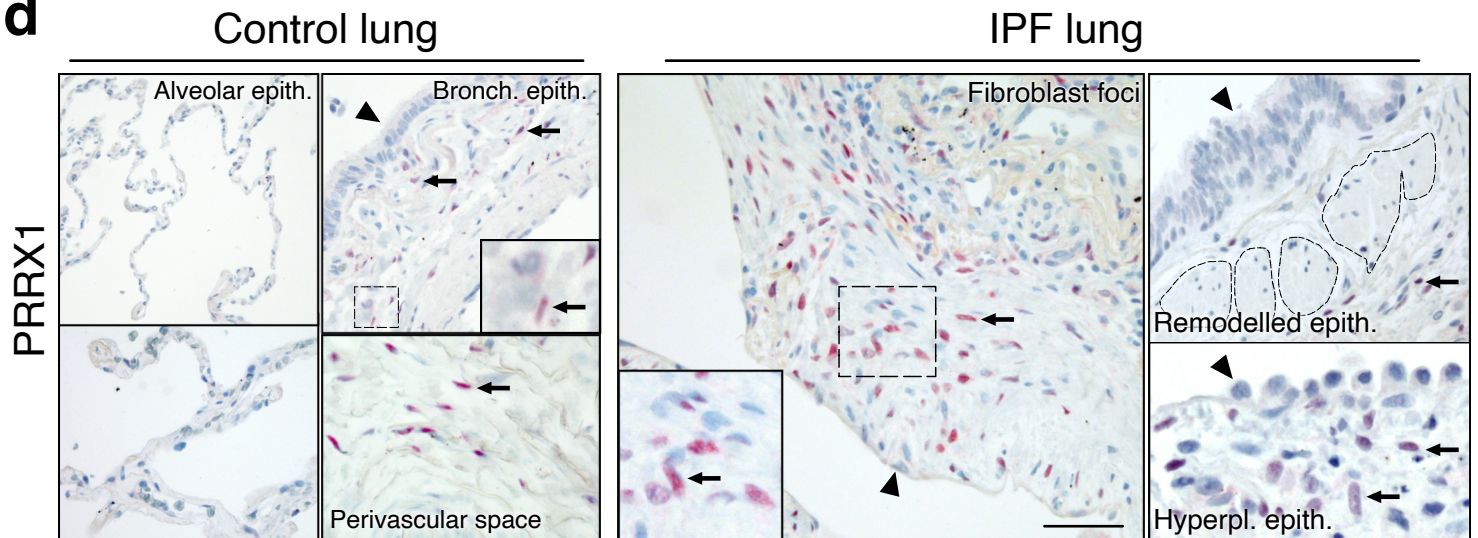

Figure 1

742 **Figure 1: Identification of PRRX1 as a transcription factor reactivated in IPF lung.**

743 (a) Venn diagram showing the number of genes up-regulated in three IPF lung Transcript  
744 microarray databases compared to controls (NCBI GEO GDS1252, GDS4279, GDS3951).  
745 Among the 210 common upregulated genes in all three datasets, 12 genes were annotated as  
746 transcription factors (table, PRRX1 is in bold). (b) Dot plots with median showing the mRNA  
747 expression of *PRRX1a* and *PRRX1b* isoforms in control (circle, n=35) and IPF (square, n=38)  
748 whole lung homogenates. (c) Immunoblot showing PRRX1 expression in control and IPF  
749 whole lung homogenates. ACTB was used as loading control. The quantification of PRRX1  
750 relative expression to ACTB in control (circle, n=7) and IPF (square, n=8) is displayed as dot  
751 plot with median on the right. (d) Representative immunohistochemistry images (n=5 per  
752 group) showing PRRX1 staining (red) in control (left panels) and IPF (right panels). Nuclei were  
753 counterstained with hematoxylin. Note the absence of PRRX1 staining in the alveolar and  
754 bronchiolar epithelium (arrow head). PRRX1 positive cells were only detected in the peri-  
755 bronchiolar and peri-vascular spaces (arrows) in control lungs (left panels). In IPF, PRRX1  
756 positive cells (arrow) were detected in the remodeled/fibrotic area (right panels). Note that  
757 epithelial cells (arrow head) and bronchiolar smooth muscle cells (dashed areas) are PRRX1  
758 negative. The high magnification pictures match the dashed boxes displayed in the main  
759 panels. Scale bar: 80µm in low magnification images and 25µm in high magnification ones.  
760 Abbreviations: *epithelium.* (*epith*); *bronchiolar.* (*bronch*); *Hyperpl.* (*hyperplastic*). Mann  
761 Whitney U test, \*p≤0.05, \*\*p≤0.01.

762

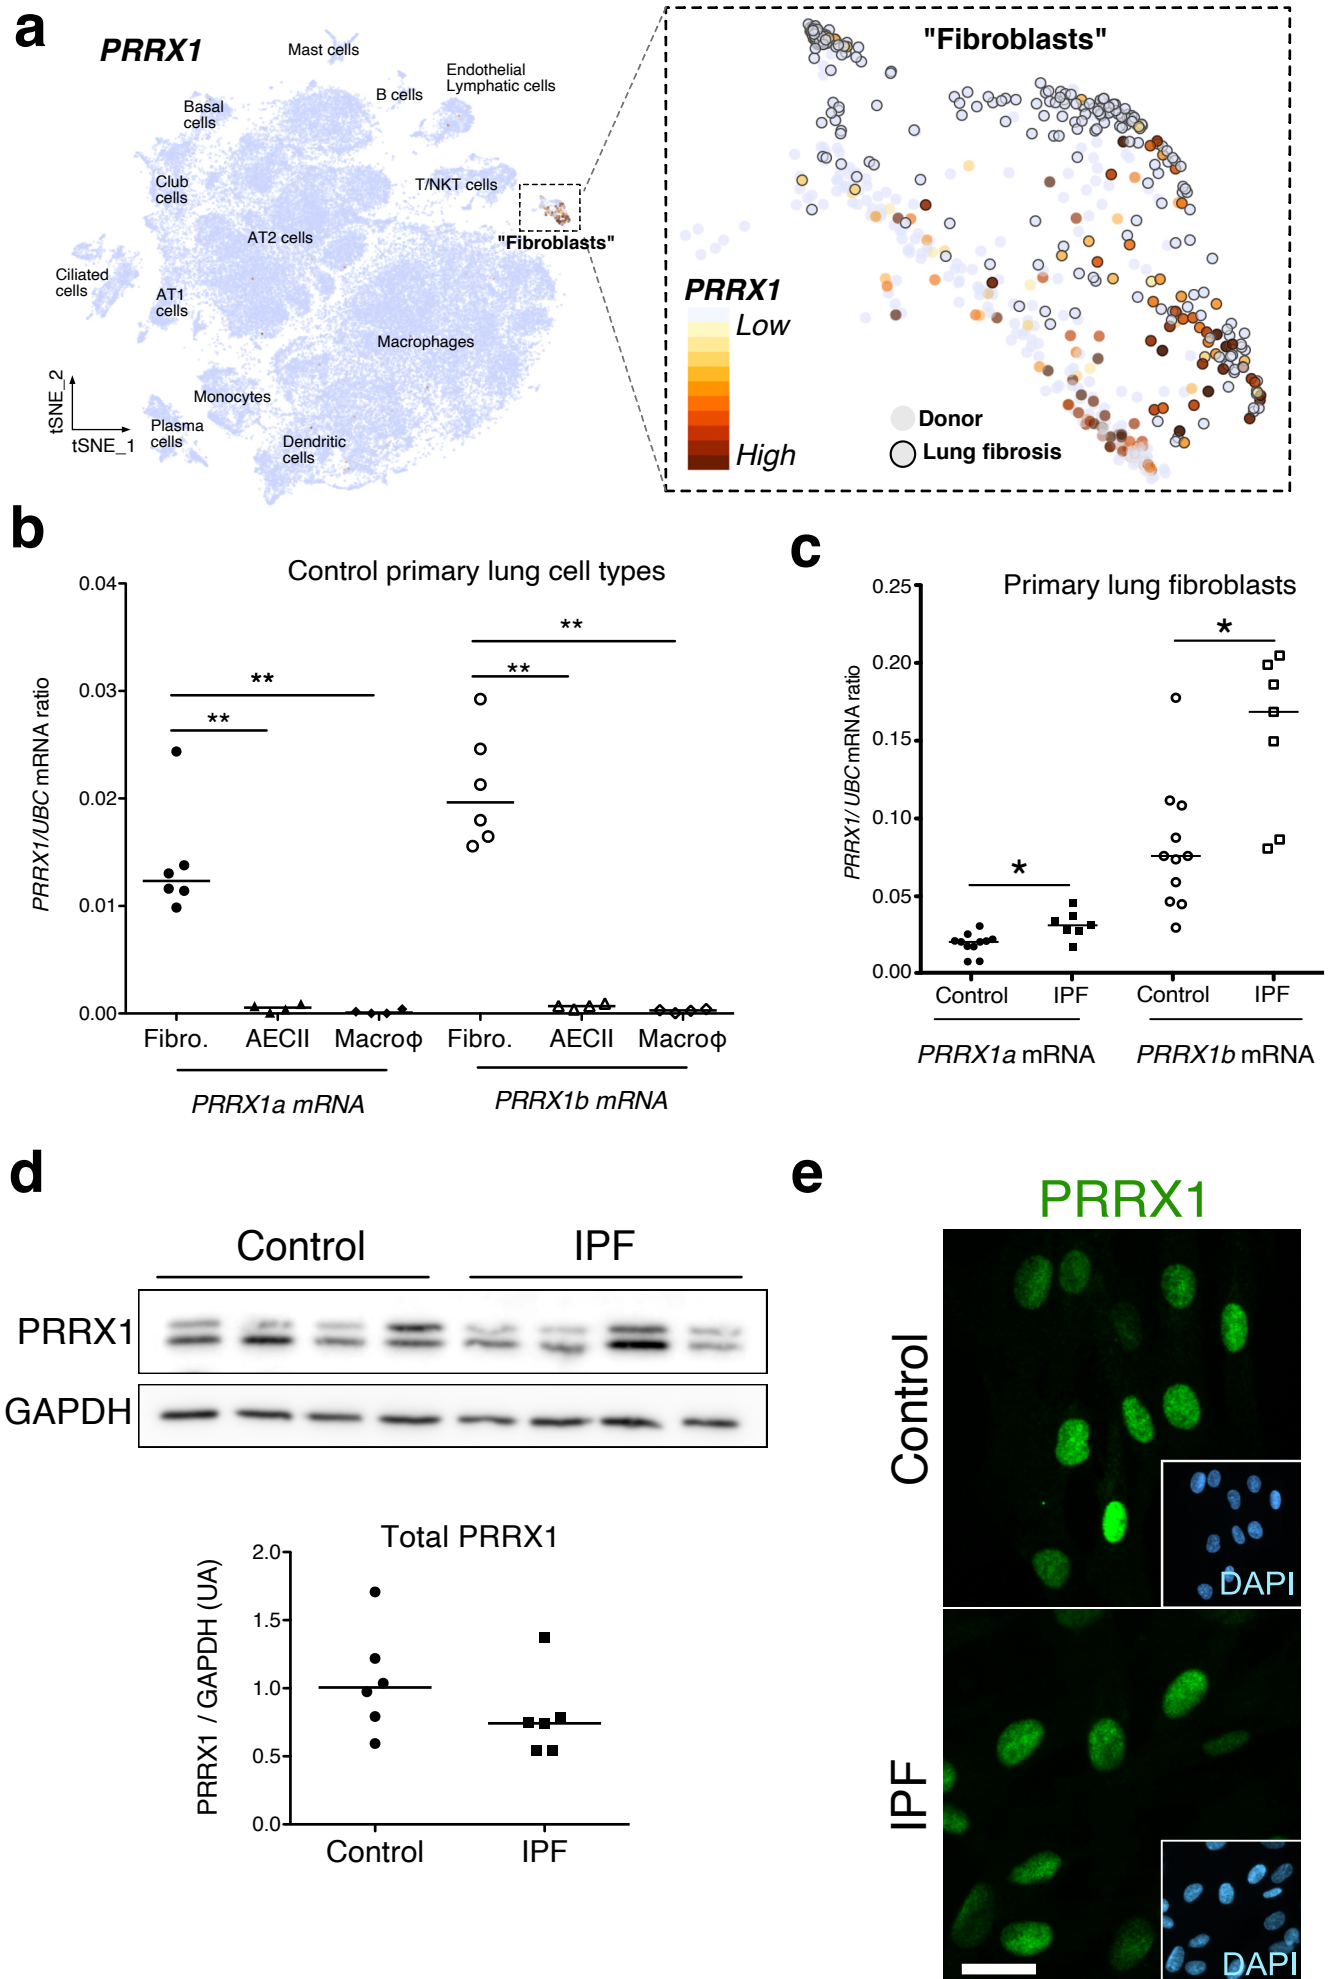

Figure 2

763 **Figure 2: PRRX1 is a mesenchymal transcription factor upregulated in primary Human**  
764 **lung IPF fibroblasts.**

765 (a) Integrated single-cell RNA-Seq analysis of donors as well as patients with pulmonary  
766 fibrosis showing diverse lung cell populations using previously published data from <sup>14</sup> (source:  
767 [www.nupulmonary.org/resources/](http://www.nupulmonary.org/resources/)). *PRRX1* mRNA expression was used to label clusters by  
768 cell identity as represented in the tSNE plot. Note that *PRRX1* mRNA expression is restricted  
769 to cell types classified as “Fibroblasts”. (b) Dot plots with median showing the mRNA  
770 expression of *PRRX1a* (black) and *PRRX1b* (white) isoforms in primary Human lung fibroblasts  
771 (circle, n=6), alveolar epithelial cells (triangle, n=4) and alveolar macrophages (diamond, n=4).  
772 (c) Dot plots with median showing the mRNA expression of *PRRX1a* (black) and *PRRX1b*  
773 (white) isoforms in control (circle, n=11) and IPF (square, n=7) primary Human lung fibroblasts.  
774 (d) Immunoblot showing PRRX1 expression in control and IPF primary Human lung fibroblasts.  
775 GAPDH was used as loading control. The quantification of PRRX1 relative expression to  
776 GAPDH in control (circle, n=6) and IPF (square, n=6) lung fibroblasts is displayed as dot plot  
777 with median below. (e) Representative Immunofluorescence images (n= 8 per group) showing  
778 PRRX1 staining (green) in control (top panel) and IPF (bottom panel) fibroblasts. Nuclei were  
779 counterstained with DAPI (inserts in main panels). Scale bar 20µm in main panels and 40µm  
780 in inserts. Abbreviations: fibroblasts (*fibro*); alveolar epithelial cells (*AECII*); alveolar  
781 macrophages (*macroφ*). Mann Whitney U test, \*p≤0.05.

782

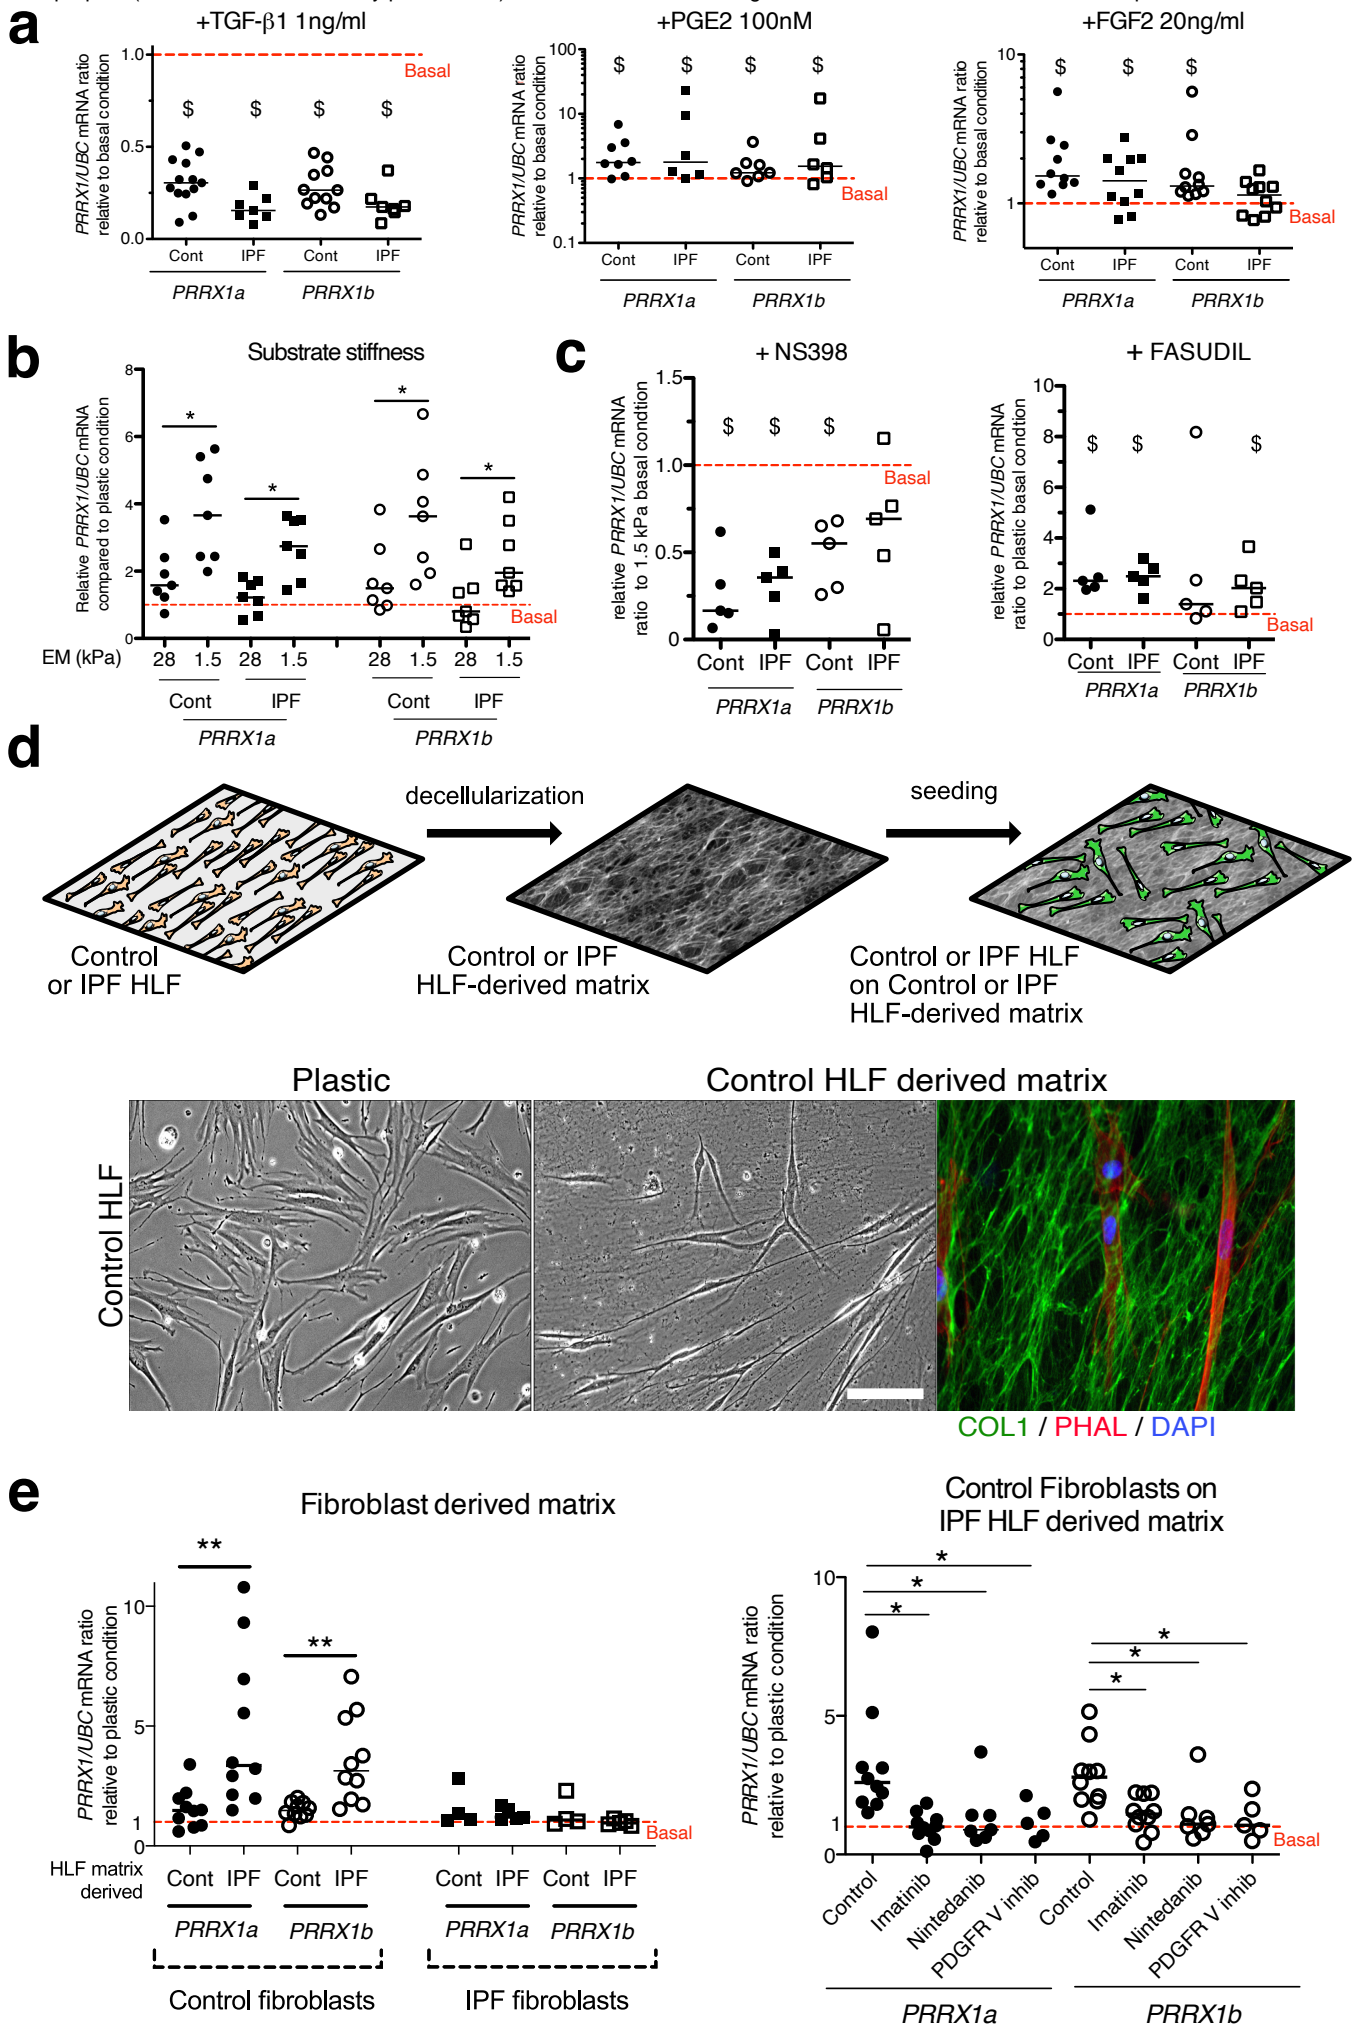

Figure 3

783 **Figure 3: PRRX1 is modulated by growth factors and matrix environment.**  
784 (a) Dot plots with median showing the mRNA expression of *PRRX1a* (black) and *PRRX1b*  
785 (white) isoforms in control (circle) and IPF (square) primary Human lung fibroblasts stimulated  
786 for 48h with TGF- $\beta$ 1 (left, n=6-7), PGE2 (middle, n=6-7) and FGF2 (right, n=10) compared to  
787 basal condition (red dashed line). (b) dot plots with median showing the mRNA expression of  
788 *PRRX1a* and *PRRX1b* isoforms in control (n=7) and IPF (n=7) lung fibroblasts cultured on stiff  
789 (28kPa) and soft (1.5kPa) substrate compared to basal condition. (c) Dot plots with median  
790 showing the mRNA expression of *PRRX1a* and *PRRX1b* isoforms in control and IPF lung  
791 fibroblasts (n=5) stimulated 48h with NS398 (left), or Fasudil (right) compared to basal  
792 condition. (d) Summary sketch of Fibroblast-derived matrix experiments (upper part). Lower  
793 part: representative phase contrast pictures of control primary lung fibroblasts on plastic (left)  
794 or seeded in a control fibroblast-derived matrix (middle) and immunofluorescence pictures  
795 (right) of Collagen 1 (green) revealing the HLF-derived matrix and actin fibers stained with  
796 Phalloidin (red). Nuclei were counterstained with DAPI (blue). (e) Left panel: dot plots with  
797 median showing the mRNA expression of *PRRX1a* and *PRRX1b* isoforms in control (n=10) or  
798 IPF fibroblasts (n=5) seeded on control or IPF derived matrix compared to basal condition.  
799 Right panel: dot plots with median showing the mRNA expression of *PRRX1a* and *PRRX1b*  
800 isoforms in control fibroblasts cultured on IPF derived matrix and stimulated with Imatinib  
801 (n=10), Nintedanib (n=7) or PDGFR V inhibitor (n=5) compared to basal condition. (Scale bar:  
802 30 $\mu$ m in phase contrast pictures and 15 $\mu$ m in the immunofluorescence one) *Abbreviations:*  
803 *Control (Cont), Human lung fibroblast (HLF), Elastic/Young modulus (EM), PHAL (Phalloidin),*  
804 *COL1 (Collagen 1).* Mann Whitney U test, \* $p \leq 0.05$  \*\* $p \leq 0.01$ ; Wilcoxon signed-rank test \$  
805  $p \leq 0.05$ .

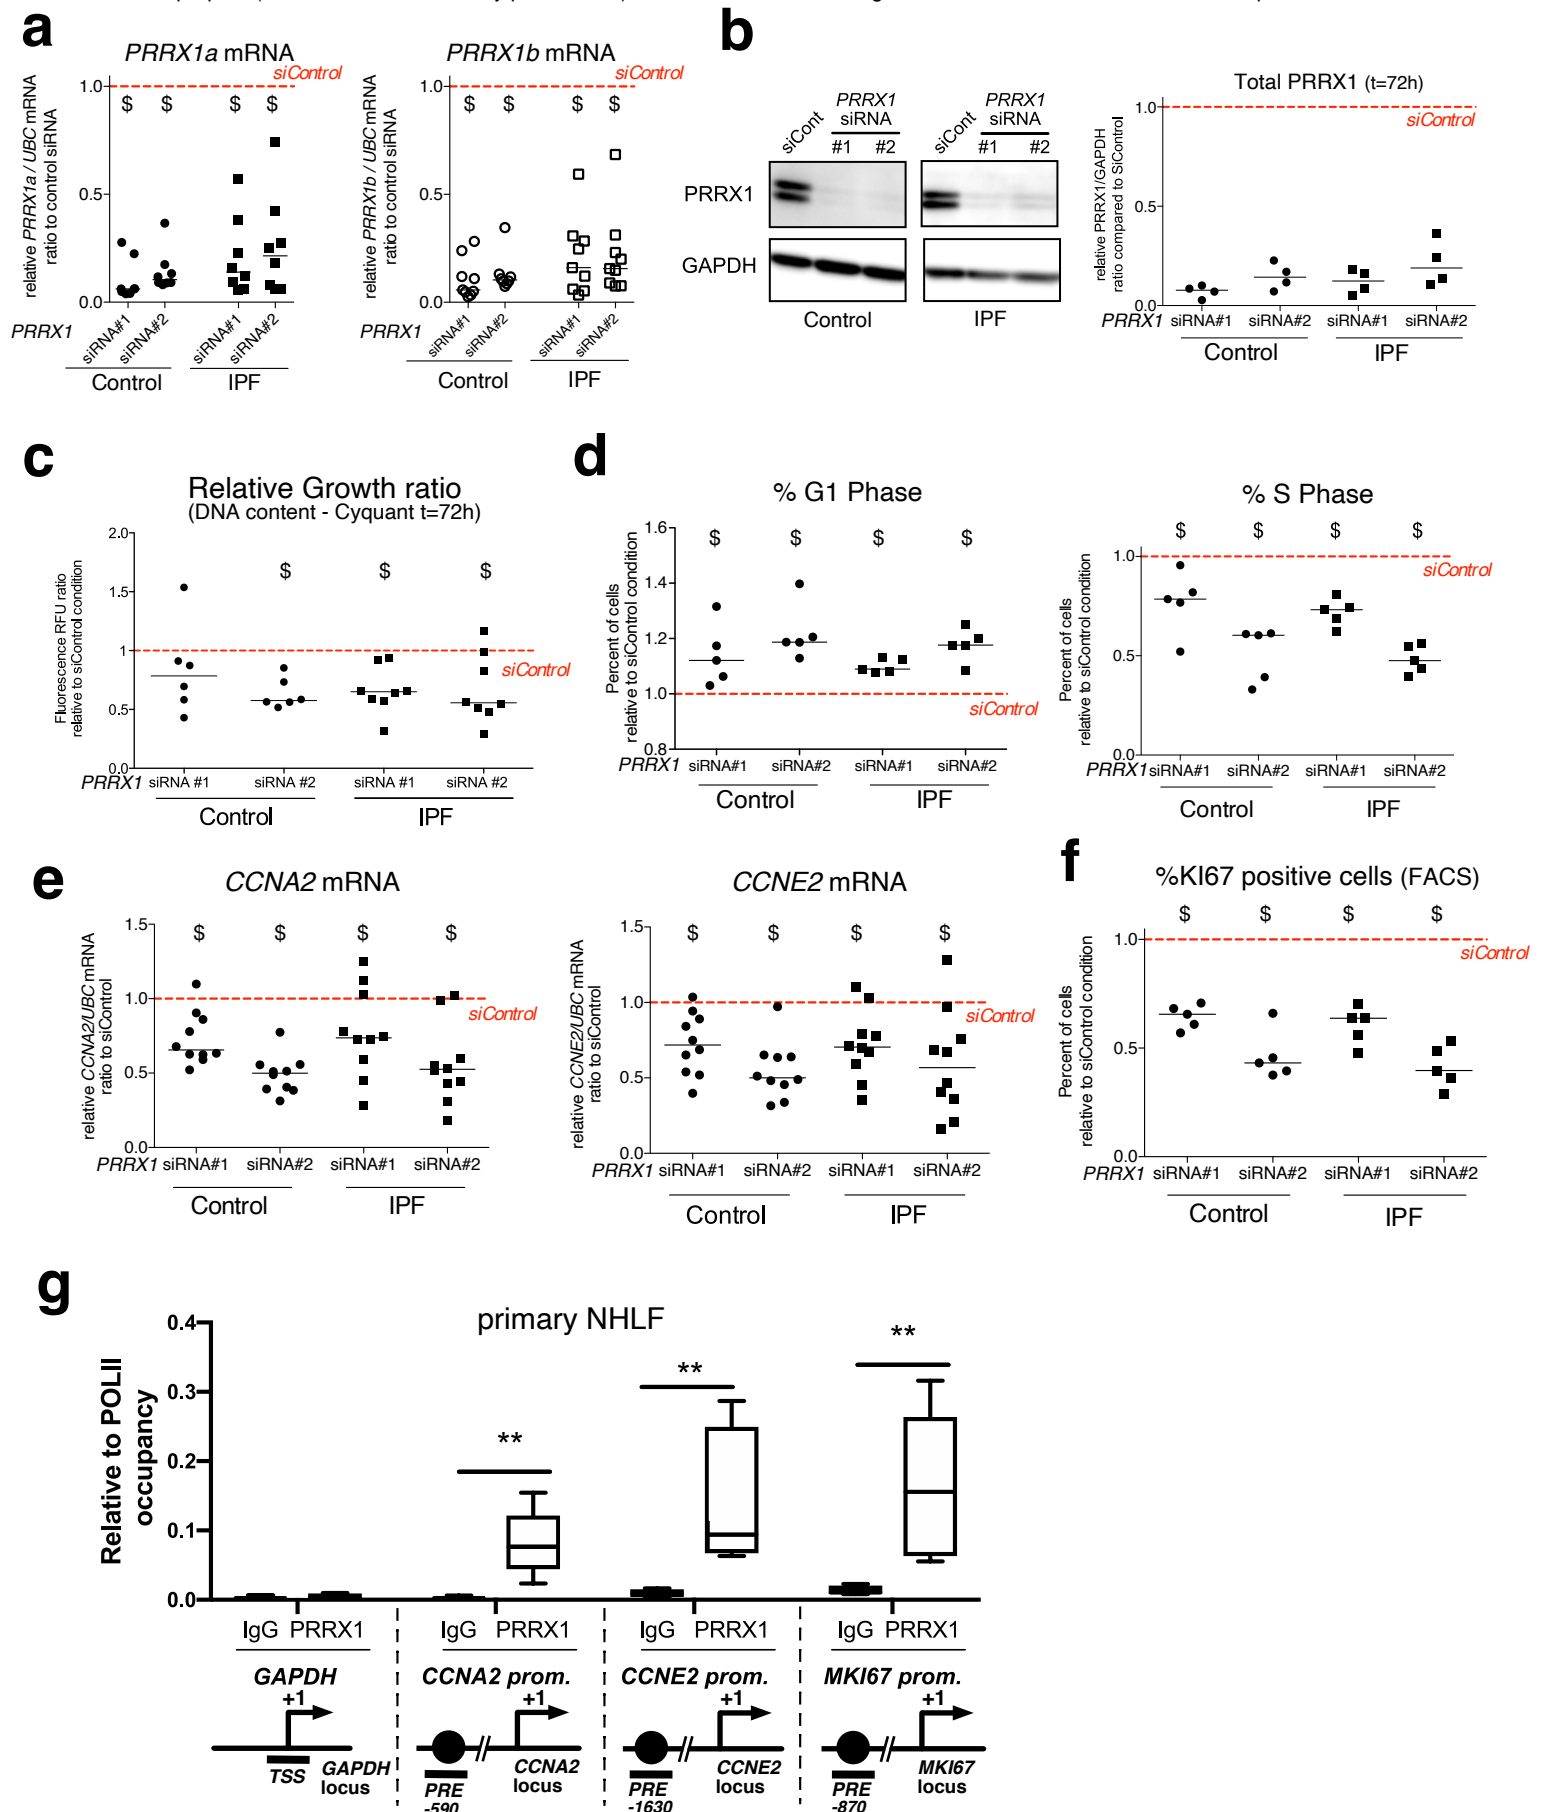

Figure 4

806 **Figure 4: PRRX1 knock down decreased cell proliferation.**

807 (a) Dot plots with median showing *PRRX1a* (black) and *PRRX1b* (white) mRNA expression  
808 relative to the siControl condition (red dashed line) in control (circle) and IPF (square)  
809 fibroblasts (n=8) treated for 48h with *PRRX1* siRNA (#1 or #2). (b) Immunoblot showing  
810 *PRRX1* expression (n=4) in control and IPF fibroblasts treated 48h with *PRRX1* siRNA (#1 or  
811 #2) or siControl. The quantification of *PRRX1* expression relative to GAPDH (loading control)  
812 is displayed as dot plot with median. (c) Dot plots with median showing the relative growth ratio  
813 of control (n=6) and IPF (n=8) fibroblasts stimulated 72h with FCS 10% and treated with  
814 *PRRX1* siRNA compared to siControl. (d) Dot plots with median showing the percent of cells  
815 in G1 (right) or S (left) phase in control and IPF fibroblasts (n=5) stimulated 72h with FCS and  
816 *PRRX1* siRNA relative to siControl. (e) Dot plots with median showing mRNA expression of  
817 *CCNA2* and *CCNE2* relative to siControl in control and IPF fibroblasts stimulated 72h with FCS  
818 and treated with *PRRX1* siRNA (n=10). (f) Dot plots with median showing the percent of cells  
819 positive for Ki67 marker in control and IPF fibroblasts stimulated 72h with FCS 10% and treated  
820 with *PRRX1* siRNA relative to siControl (n=5). (g) ChIP analysis for PRRX1 recruitment at the  
821 promoter of *GAPDH*, *CCNA2*, *CCNE2* and *MKI67* in NHLF (n=5) relative to RNA POL-II  
822 occupancy, displayed as boxes with median and min to max. The diagrams of the different loci  
823 are showing the PRRX1 response element position relative to the TSS. The PCR amplified  
824 regions are underscored. Abbreviations: FCS (fetal calf serum); TSS (transcription starting  
825 site); IgG (Immunoglobulin); PRE (PRRX1 responses element); SRE (SRF response element),  
826 control siRNA sequence (siControl). Wilcoxon signed-rank test, \$ p≤0.05, Wilcoxon matched-  
827 paired signed rank test \*\* p<0.01.

828



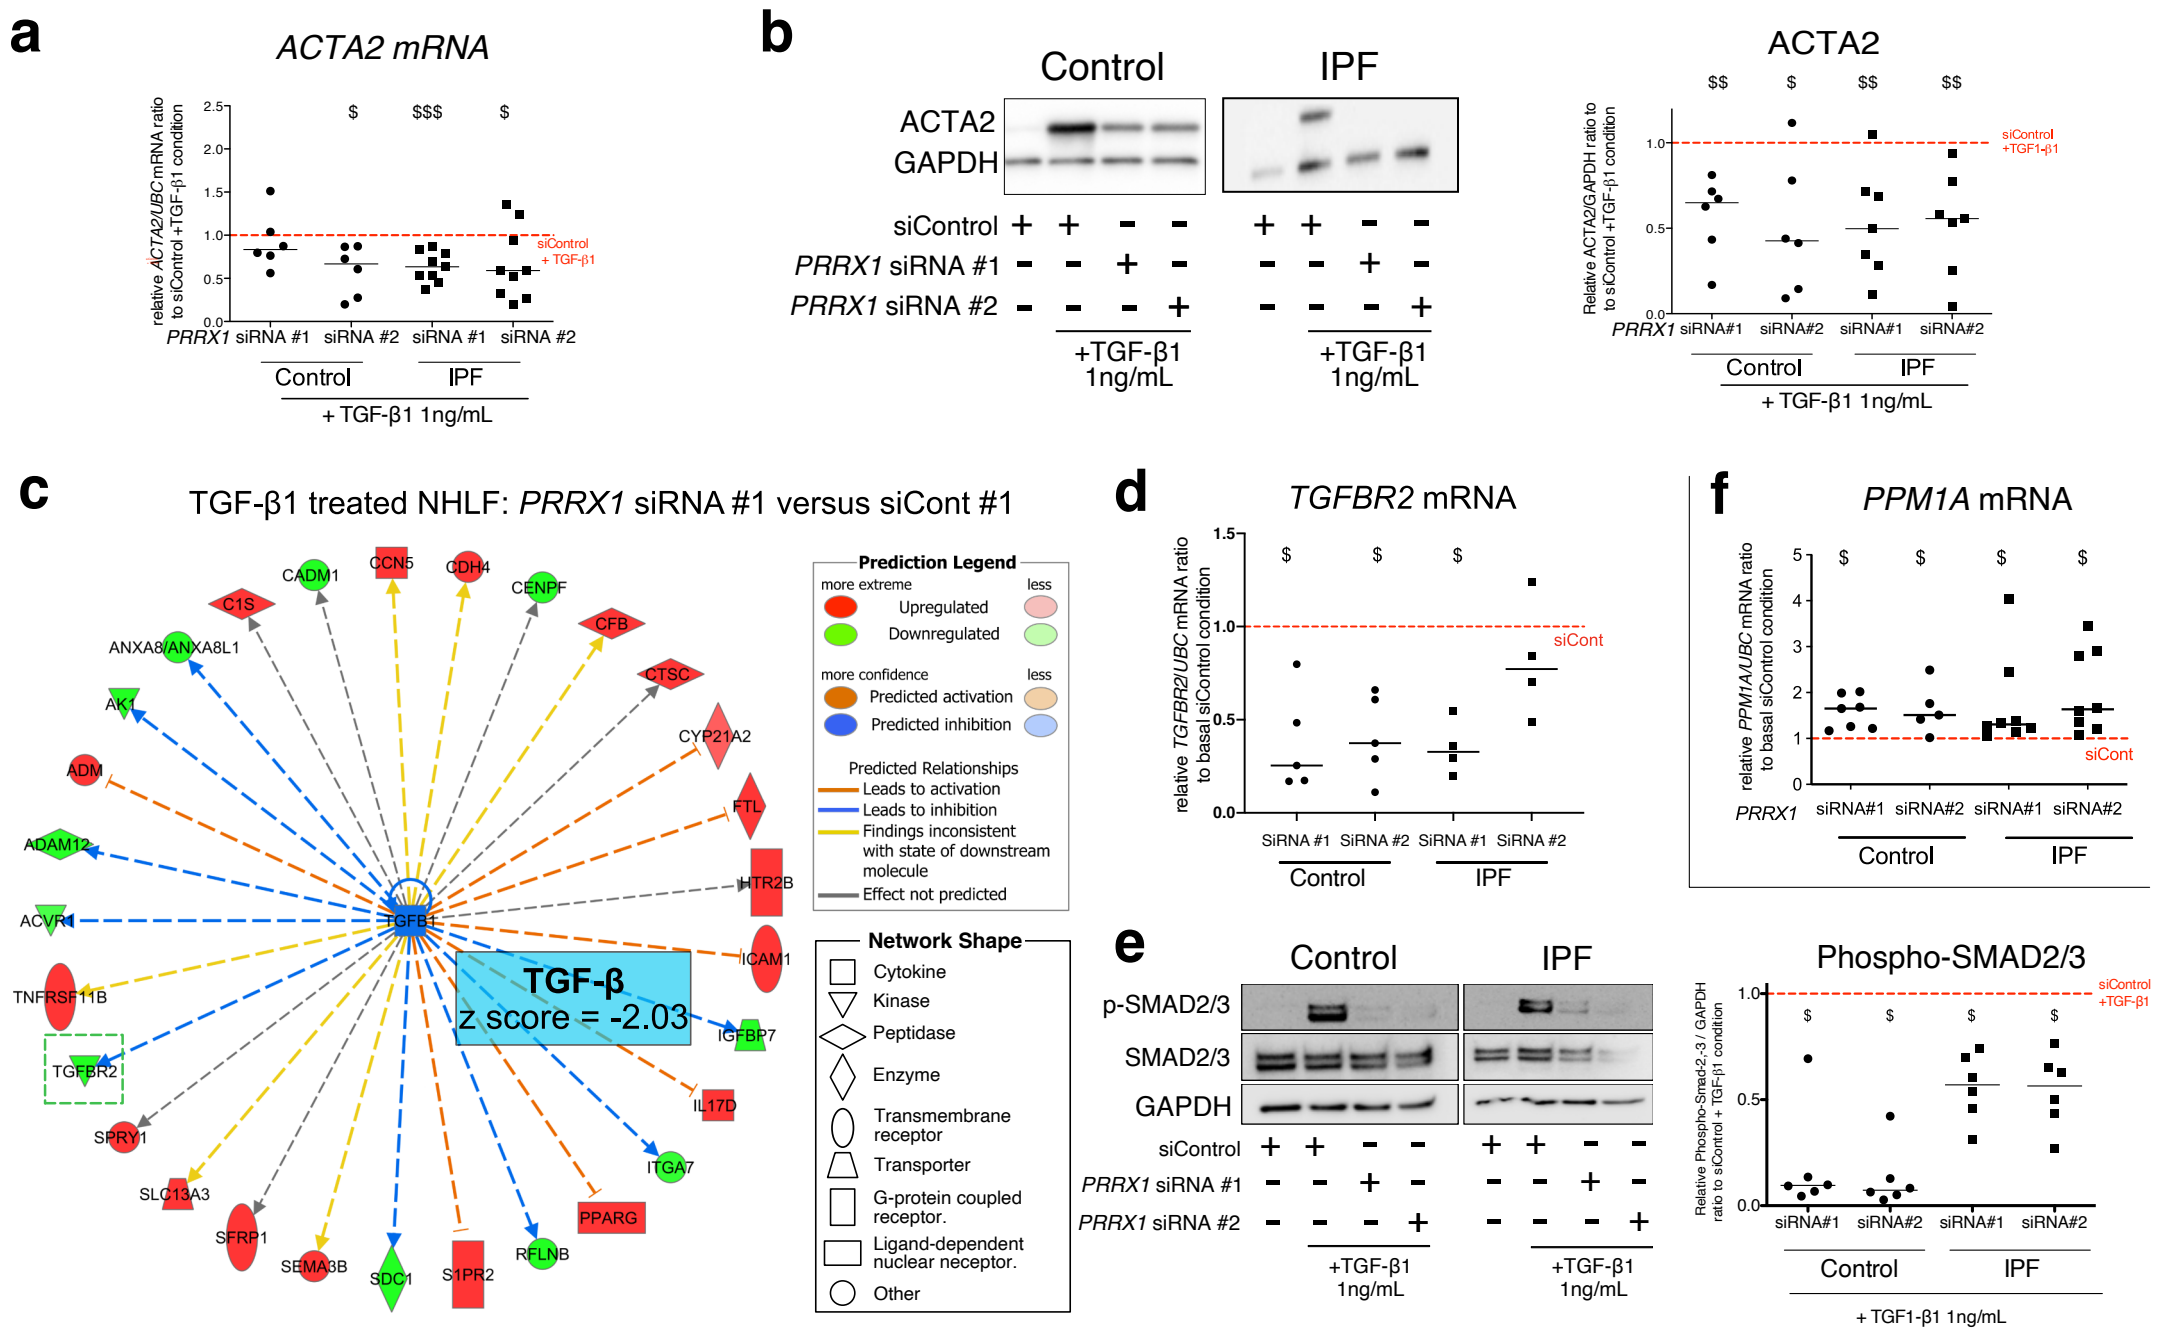

Figure 5

829 **Figure 5: *PRRX1* inhibition decreased myofibroblast differentiation upon TGF1- $\beta$ 1**  
830 **stimulation.**

831 (a) Dot plots with median showing the mRNA expression of *ACTA2* relative to the siControl  
832 +TGF- $\beta$ 1 condition (red dashed line), in control (circle, n=6) and IPF (square, n=9) lung  
833 fibroblasts treated with TGF- $\beta$ 1 and *PRRX1* siRNA (#1 or #2). (b) Immunoblot showing *ACTA2*  
834 expression in control (n=6) and IPF (n=7) fibroblasts treated with siControl in absence or  
835 presence of TGF- $\beta$ 1 or with *PRRX1* siRNA and TGF- $\beta$ 1. The quantification of *ACTA2*  
836 expression relative to GAPDH (loading control) in control and IPF fibroblasts treated with  
837 control or *PRRX1* siRNA in presence of TGF- $\beta$ 1 relative to siControl + TGF- $\beta$ 1 condition is  
838 displayed as dot plot with median on the right. (c) Ingenuity Pathway Analysis of whole  
839 transcriptome in NHLF treated for 48h with *PRRX1* siRNA in the presence of TGF- $\beta$ 1 indicated  
840 that the best predicted upstream regulator was *TGFB1* (z score=-2.03, *PRRX1* siRNA#1  
841 versus siControl#1, n=2). Inhibition of *TGFBR2* is framed with a green dashed border. Figure  
842 legend displays molecules and function symbol types and colors. (d) Dot plots with median  
843 showing the mRNA expression of *TGFBR2* (n=4 to 5) relative to siControl in control and IPF  
844 fibroblasts treated for 48h with *PRRX1* siRNA. (e) Immunoblot showing phospho-SMAD2/3  
845 and SMAD2/3 expression in control and IPF fibroblasts treated for 30 minutes with TGF- $\beta$ 1  
846 after 48h transfection with *PRRX1* siRNA. The quantification of phospho-SMAD2/3 and  
847 SMAD2/3 expression relative to GAPDH (loading control) in control (n=6) and IPF (n=6) lung  
848 fibroblasts treated for 30 minutes with TGF- $\beta$ 1 after 48h transfection with *PRRX1* siRNA  
849 relative to siControl + TGF- $\beta$ 1 condition (red dashed line), is displayed as dot plot with median  
850 on the right. (f) Dot plots with median showing the mRNA expression of *PPM1A* (n=7 to 8)  
851 relative to siControl in control and IPF fibroblasts treated for 48h with *PRRX1* siRNA.  
852 *Abbreviations: control siRNA sequence (siControl),  $\beta$ -Tubulin (TUB).* Wilcoxon signed-rank  
853 test, \$ p $\leq$ 0.05, \$\$ p $\leq$ 0.01, \$\$\$ p $\leq$ 0.001.

854

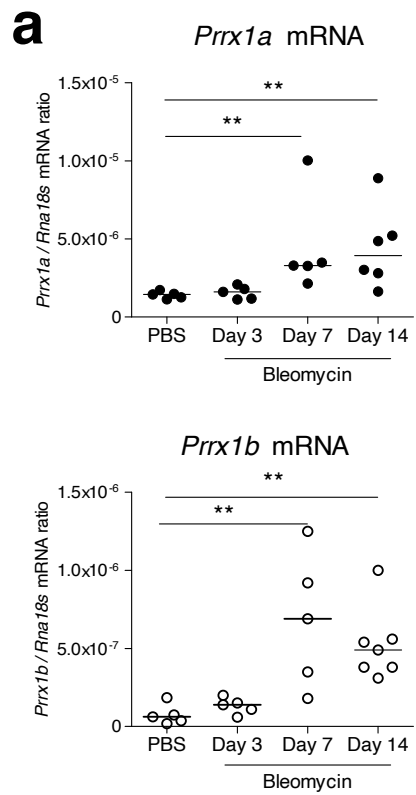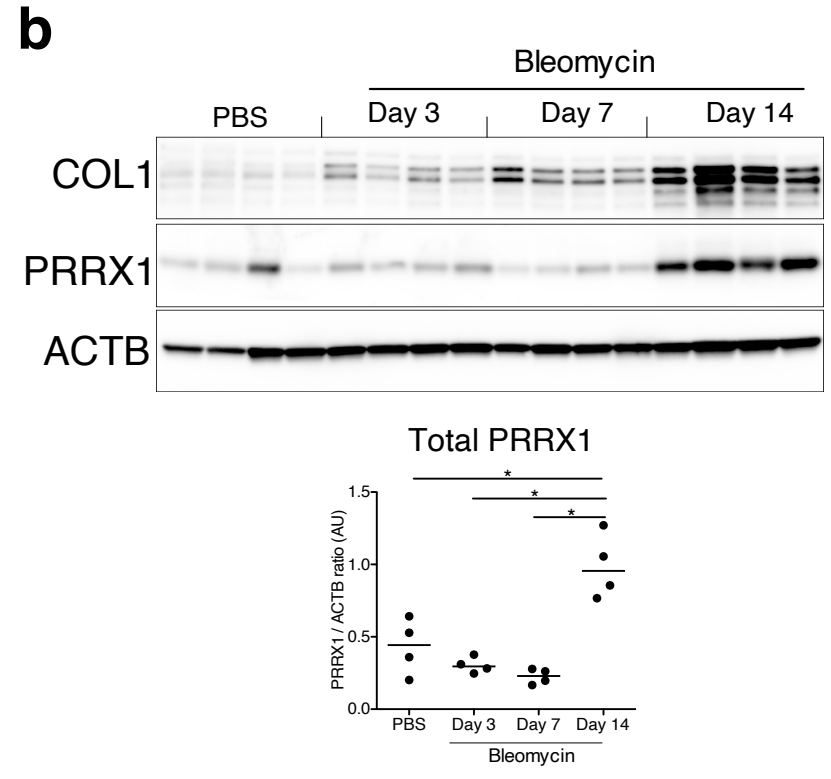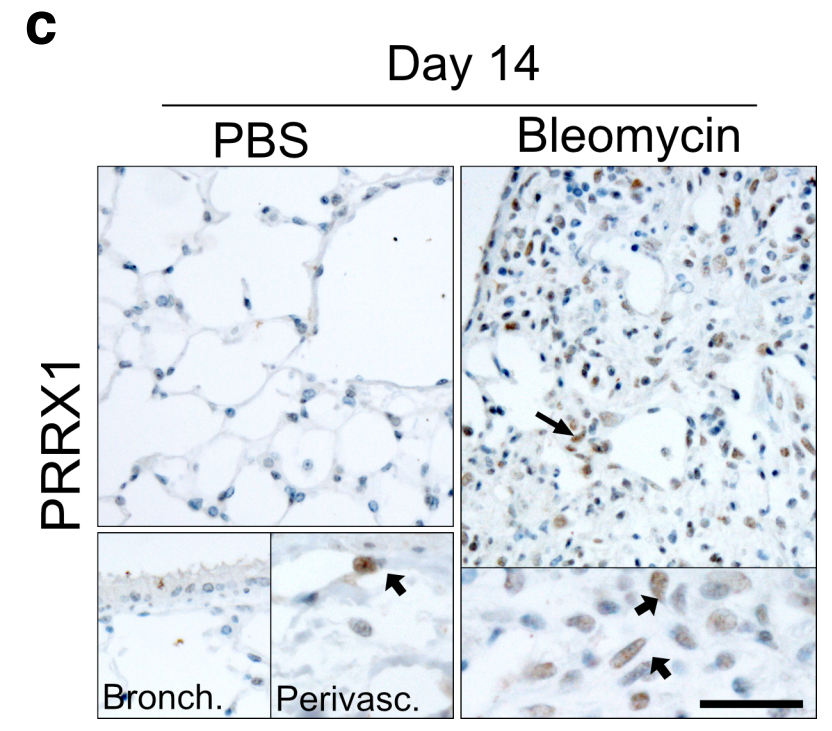

Figure 6

855 **Figure 6: PRRX1 is increased during fibrotic phase in mice bleomycin-induced fibrosis.**  
856 (a) Dot plots with median showing the mRNA expression of *Prrx1a* (black circle) and *Prrx1b*  
857 (white circle) isoforms in PBS mice (n=5) and bleomycin-treated mice at day 3 (n=5), 7 (n=5)  
858 and 14 (n=6). (b) Immunoblot showing COL1 and PRRX1 expression in PBS and bleomycin-  
859 treated mice at day 3, 7 and 14 (n=4 per group). ACTB was used as loading control. The  
860 quantification of PRRX1 expression relative to ACTB in PBS and bleomycin mice is displayed  
861 as dot plot with median in the lower part of the panel. (c) Representative immunohistochemistry  
862 pictures (n= 3 per group) showing PRRX1 staining (brown) in PBS and bleomycin mice at day  
863 14 after saline or bleomycin administration. Nuclei were counterstained with hematoxylin. Note  
864 the absence of PRRX1 staining in the bronchiolar epithelium. PRRX1 positive cells were only  
865 detected in the peri-vascular spaces (arrows) in naive mice lungs (lower left panels). In  
866 bleomycin-treated mice, PRRX1 positive cells (arrow) were detected in the remodeled/fibrotic  
867 area (right panels). Scale bar: 30  $\mu$ m in low magnification images and 15 $\mu$ m in high  
868 magnification ones. Abbreviations: bronchiolar (bronch); perivascular (perivasc). Kruskal-  
869 Wallis test with Dunns post-test, \* $p \leq 0.05$ , \*\* $p \leq 0.01$ .  
870  
871

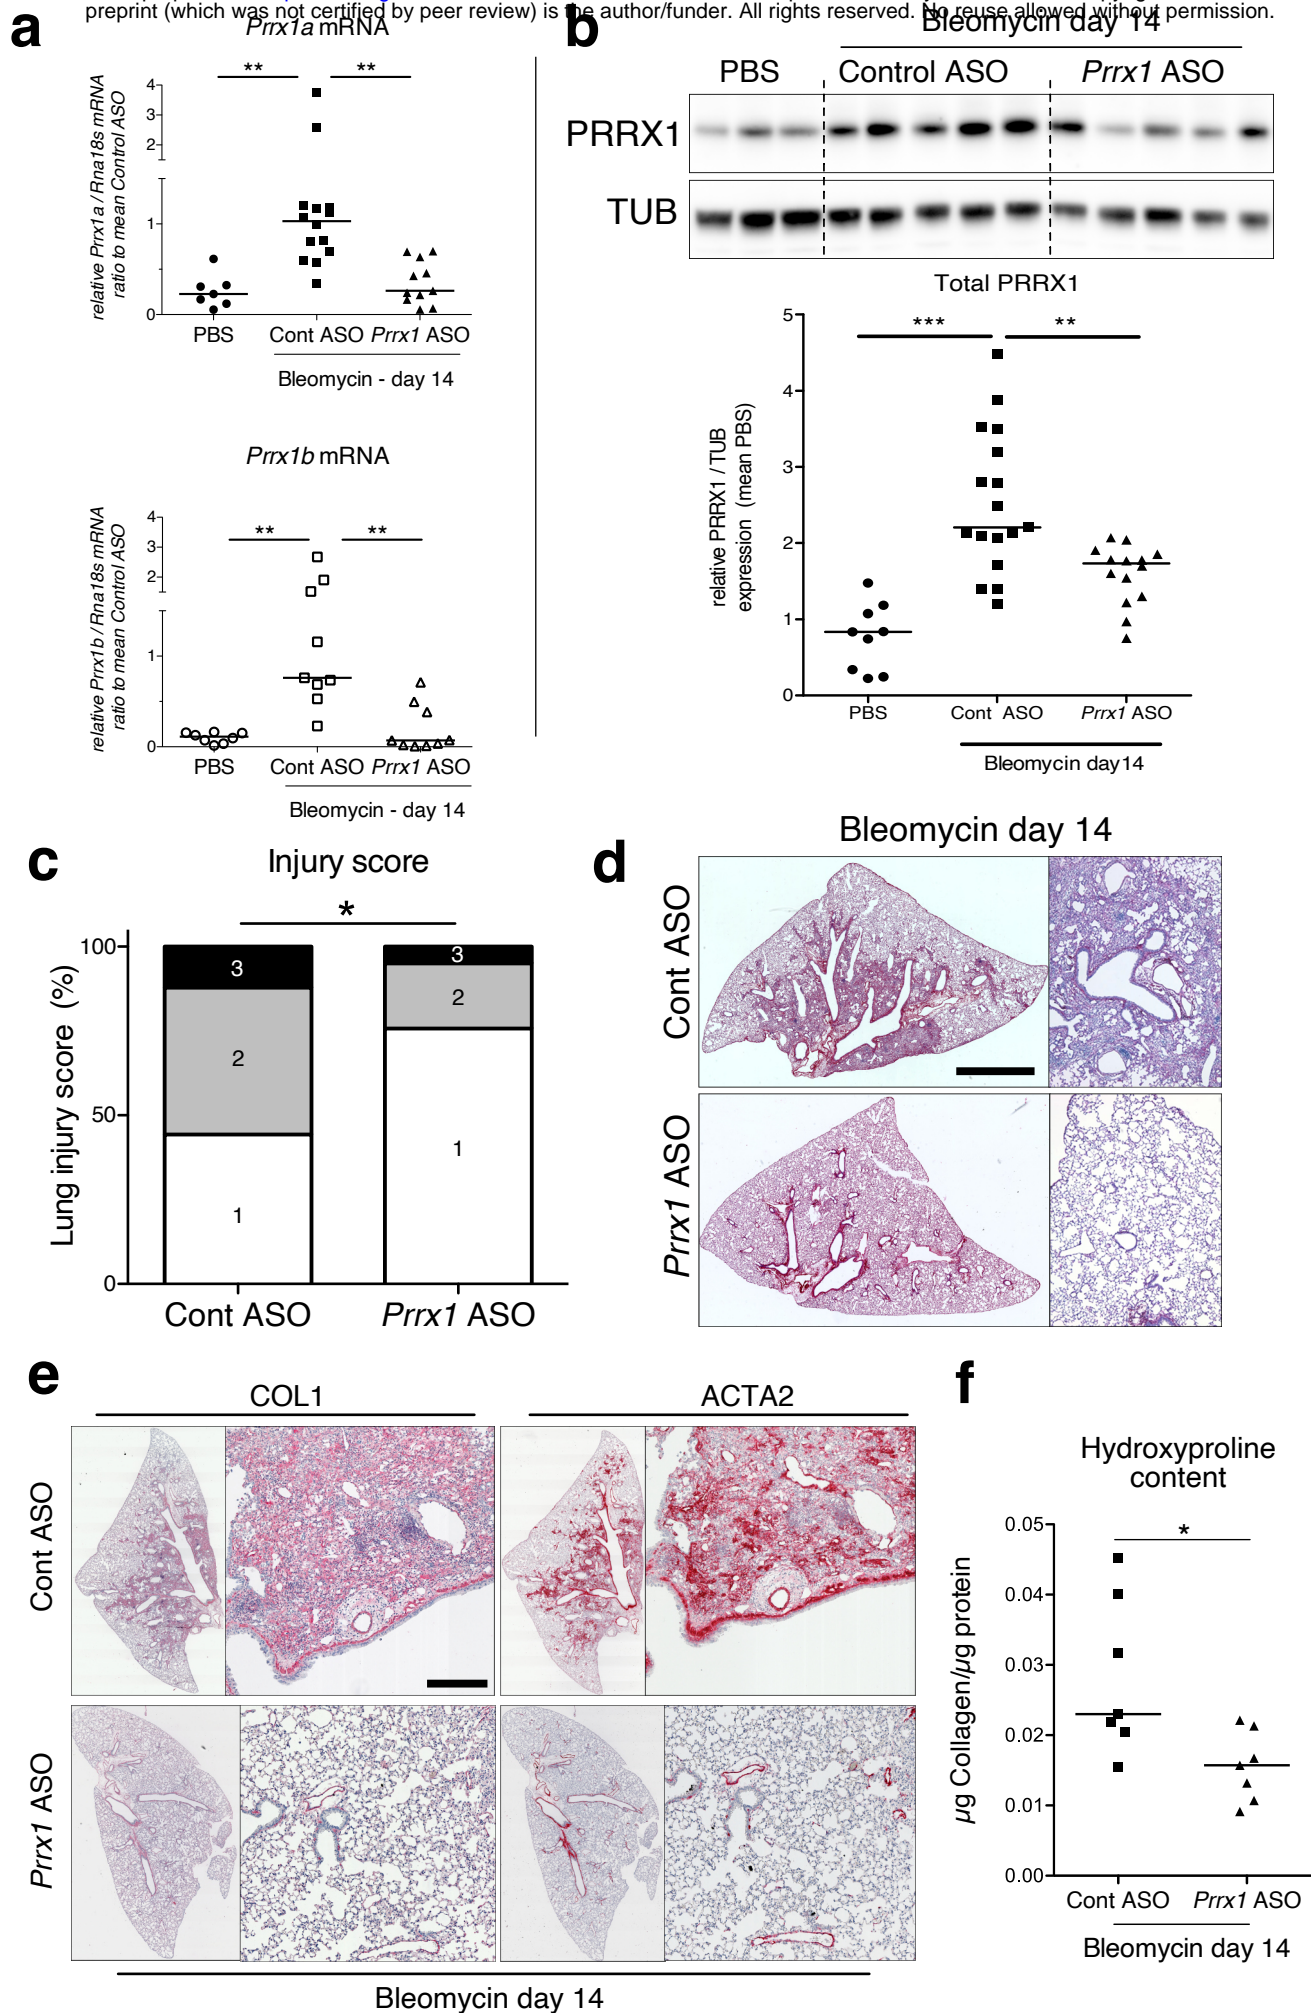

Figure 7

872 **Figure 7: PRRX1 inhibition attenuates lung fibrosis in bleomycin murine model.**  
873 (a) Dot plots with median showing the mRNA expression of *Prrx1a* (black) and *Prrx1b* (white)  
874 isoforms at day 14 (n=8) in PBS (circle) mice and bleomycin mice treated with control ASO  
875 (square, n=14) or *PRRX1* ASO (triangle, n=11). (b) Immunoblot showing PRRX1 expression  
876 at day 14 in PBS mice and bleomycin mice treated with Control ASO or *Prrx1* ASO. TUB was  
877 used as loading control. The quantification of PRRX1 expression relative to TUB at day 14 in  
878 PBS mice (circle, n=9) and bleomycin mice treated with Control ASO (square, n=16) or *Prrx1*  
879 ASO (triangle, n=14) is displayed as dot plot with median on the lower panel. (c) Injury score  
880 at day 14 of bleomycin mice treated with *Prrx1* ASO or Control ASO. (d) Representative  
881 immunohistochemistry images (n= 7 per group) showing picosirius staining (red) at day 14 in  
882 bleomycin mice treated with Control ASO or *Prrx1* ASO. (e) Representative  
883 immunohistochemistry images (n= 7 per group) showing COL1 (left panel) and ACTA2 (right  
884 panel) staining (red) at day 14 in bleomycin mice treated with Control ASO or *Prrx1* ASO.  
885 Nuclei were counterstained with hematoxylin. (f) Dot plot with median showing the relative  
886 Collagen content as measured by hydroxyproline at day 14 in bleomycin mice treated with  
887 control ASO (square, n=7) or *PRRX1* ASO (triangle, n=7). Scale bar: 80µm in low magnification  
888 images and 40µm in high magnification ones. *Abbreviations: Control (Cont), Antisense*  
889 *oligonucleotide (ASO)*. Kruskal-Wallis test with Dunns post-test (A and B), Fisher's exact test  
890 (C) and Mann Whitney U test (F); \*p≤0.05, \*\*p≤0.01, \*\*\*p≤0.001  
891

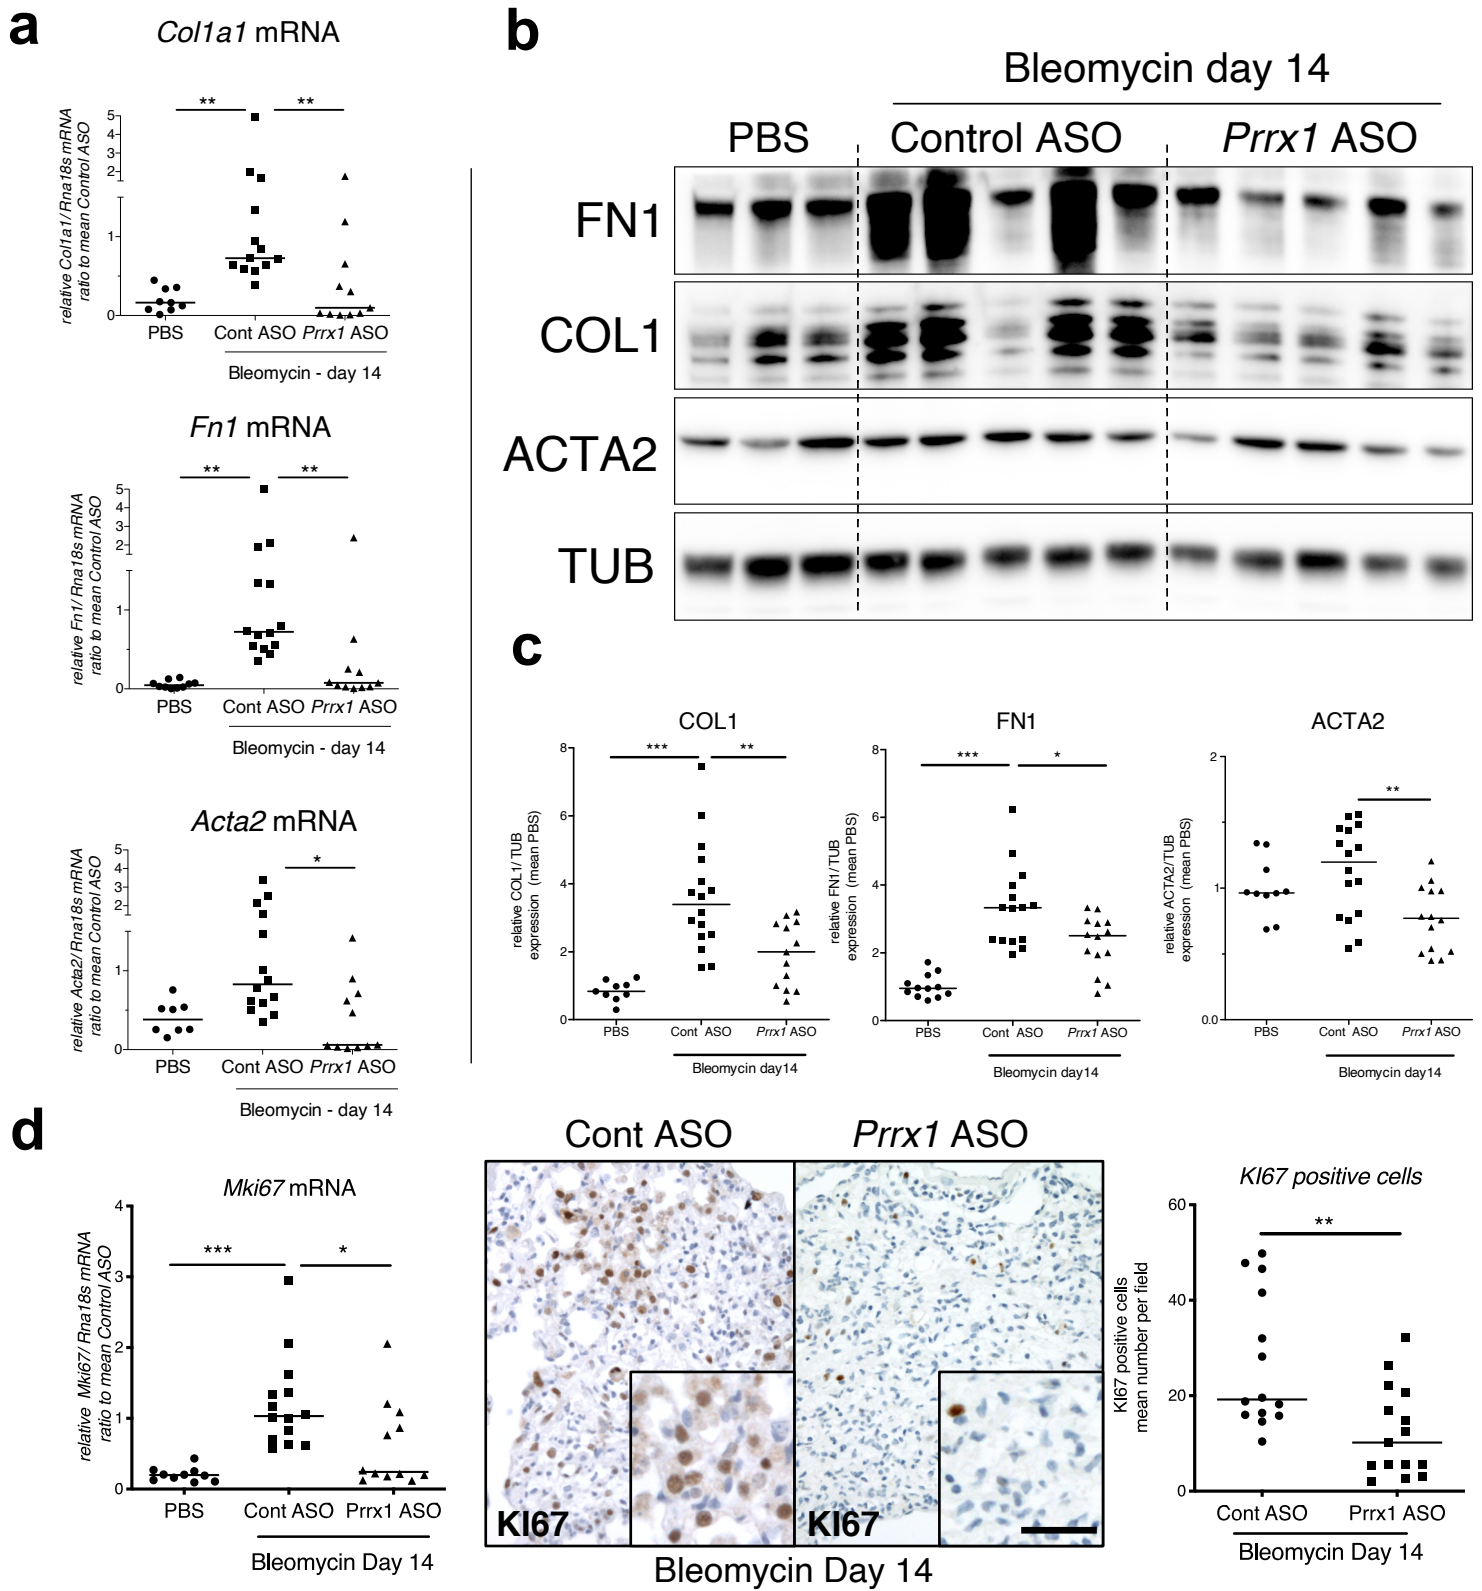

Figure 8

892 **Figure 8: PRRX1 inhibition decreases fibrosis markers in bleomycin mice.**

893 (a) Dot plots with median showing the mRNA expression of *Col1a1*, *Fn1* and *Acta2* at day 14  
894 in PBS mice (circle, n=9) and bleomycin mice treated with Control ASO (square, n=14) or *Prrx1*  
895 ASO (triangle, n=11). (b) Immunoblot showing FN1, COL1 and ACTA2 expression at day 14  
896 in PBS mice and bleomycin mice treated with Control ASO or *Prrx1* ASO. TUB was used as  
897 loading control. (c) Quantification of FN1, COL1 and ACTA2 relative expression to TUB at day  
898 14 in PBS mice (n=9) and bleomycin mice treated with Control ASO (n=16) or *Prrx1* ASO  
899 (n=13) (d) Left panel: dot plots with median showing *Mki67* mRNA expression of at day 14 in  
900 PBS mice (circle, n=10) and bleomycin mice treated with Control ASO (square, n=14) or *Prrx1*  
901 ASO (triangle, n=14). Middle panel: representative immunohistochemistry pictures (n= 14 per  
902 group) showing KI67 staining (brown) in bleomycin treated with Control ASO (left) or *Prrx1*  
903 ASO (right) mice at day 14. The quantification of the number of KI67 positive cells per high  
904 magnification field is shown on the right as dot plots with median. Scale bar: 40µm in low  
905 magnification images and 20µm in high magnification ones. *Abbreviations: Control (Cont),*  
906 *Antisense oligonucleotide (ASO).* Kruskal-Wallis test with Dunns post-test (A, B) and Mann  
907 Whitney U test (C); \*p≤0.05, \*\*p≤0.01f, \*\*\*p≤0.001

908

909



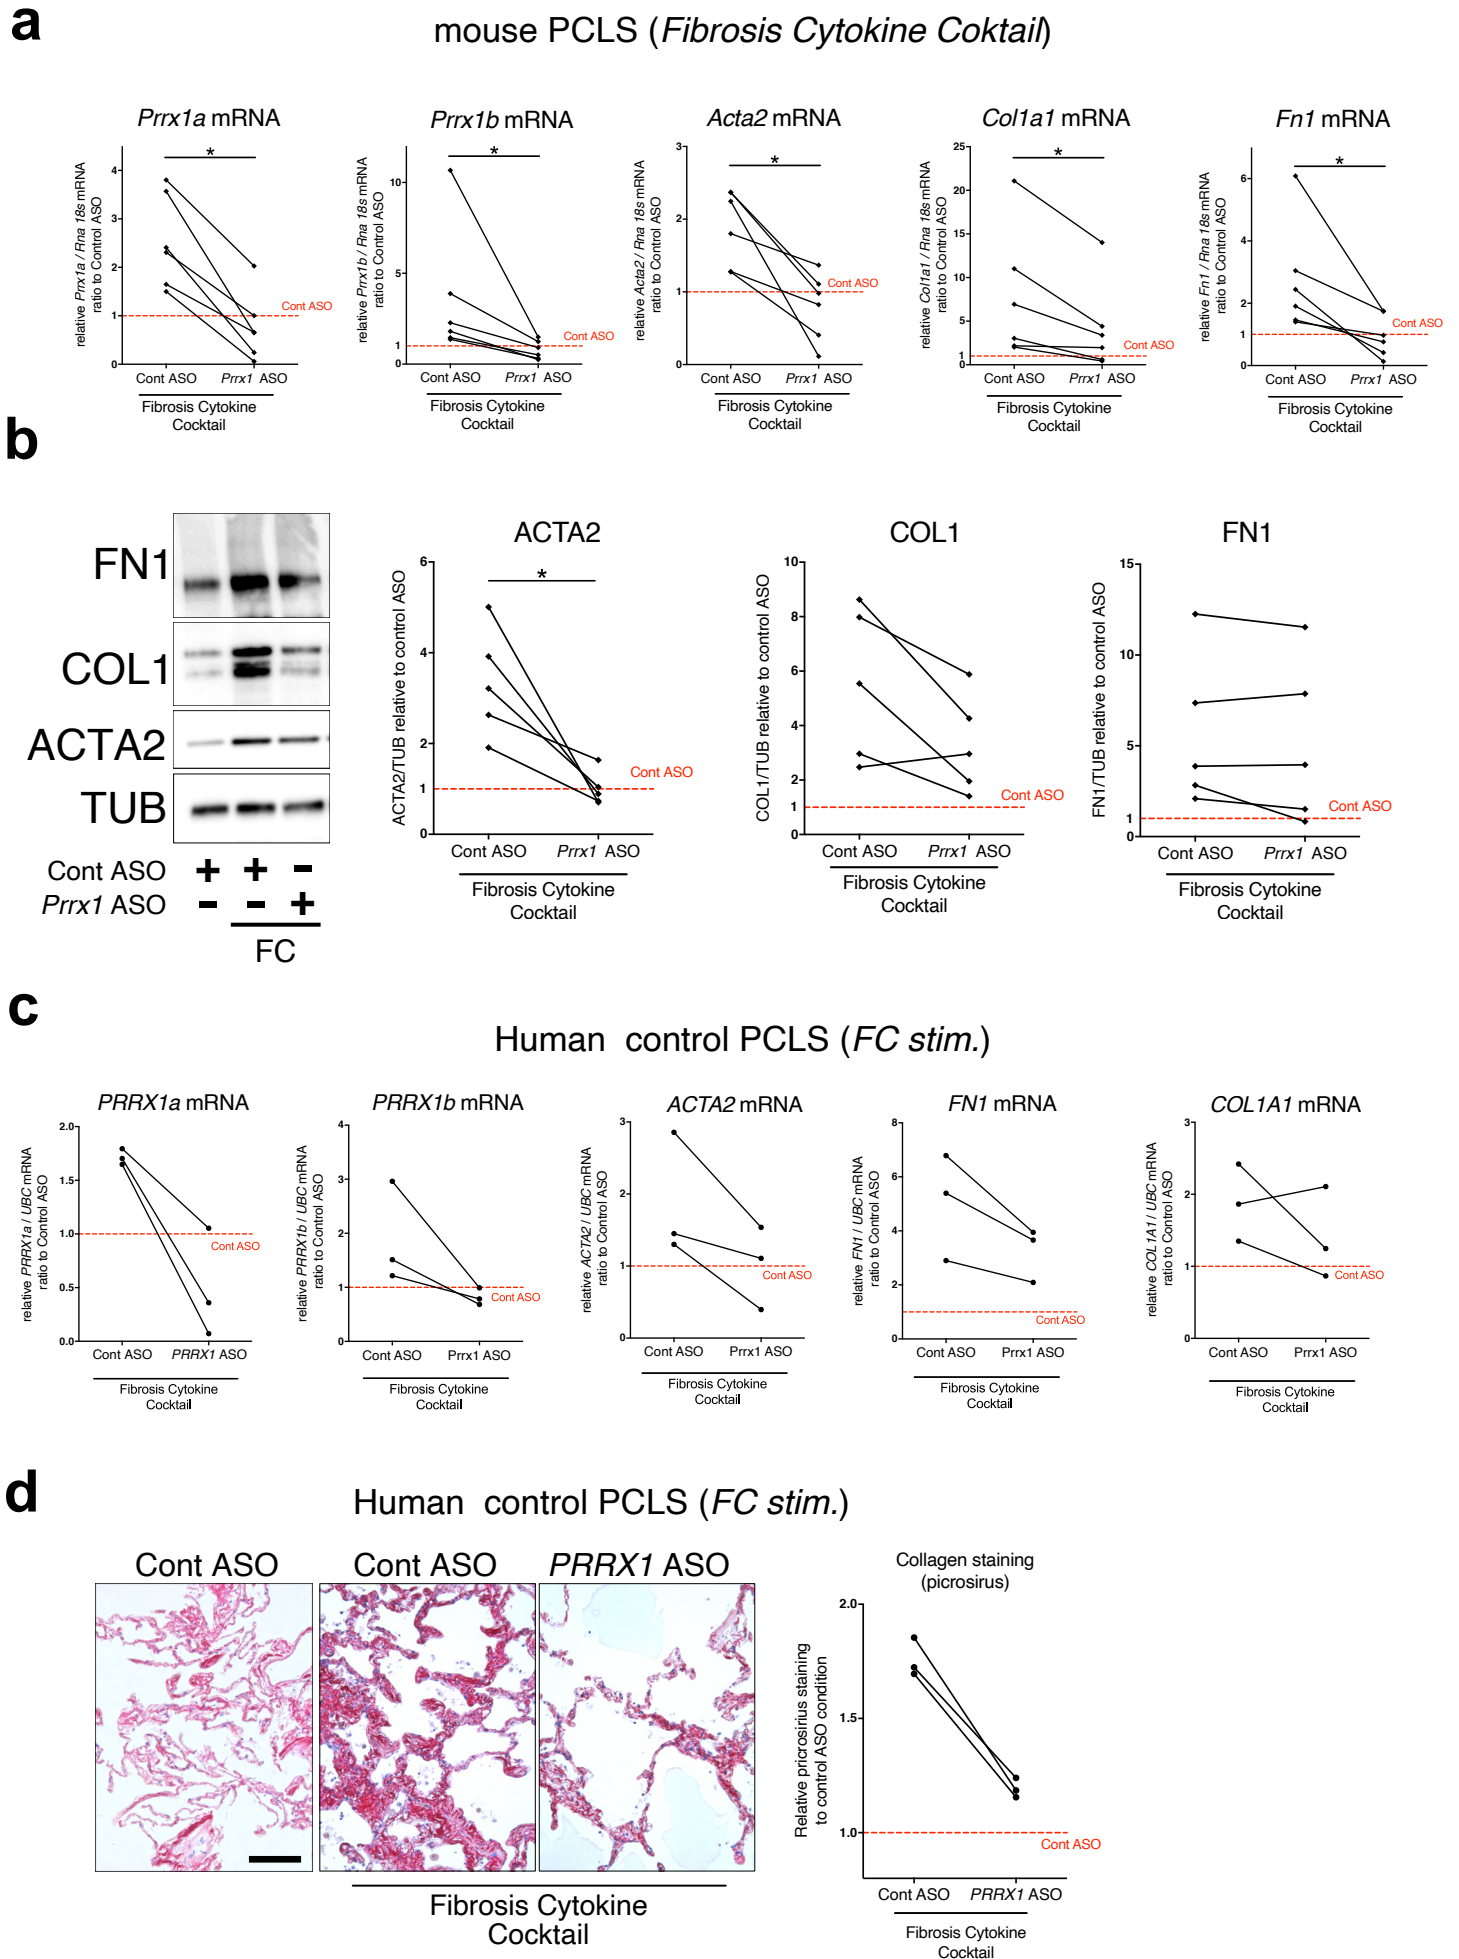

Figure 9

910 **Figure 9 *PRRX1* ASO attenuates lung fibrosis in mouse and Human Precision-cut Lung**  
911 **slices (PCLS)**

912 (a) Before-after plots showing the mRNA expression of *Prrx1a*, *Prrx1b*, *Acta2*, *Col1a1* and *Fn1*  
913 (n=6) relative Control ASO alone condition (red dashed line) in mouse PCLS stimulated with  
914 fibrosis cytokine cocktail (FC) and then treated either with control ASO or *PRRX1* ASO. (b)  
915 Representative immunoblot showing FN1, COL1 and ACTA2 expression relative to control  
916 ASO alone condition (red dashed line) in mouse PCLS stimulated with FC and then treated  
917 either with control or *Prrx1* ASO. The corresponding quantifications of ACTA2, COL1 and FN1  
918 expression ratio to Tubulin are displayed as before-after plots on the right. Note that COL1  
919 expression was decreased in 4 out 5 experiments. (c) Before-after plots showing the mRNA  
920 expression of *PRRX1a*, *PRRX1b*, *ACTA2*, *COL1A1* and *FN1* (n=3) relative Control ASO  
921 condition (red dashed line) in Human PCLS treated either with control ASO or *PRRX1* ASO in  
922 presence or absence of FC. *COL1A1* upregulation was lessened in 2 out 3 experiments while  
923 ACTA2 and FN1 levels were decreased in 3 out of 3 experiments. (d) Representative  
924 picrosirius staining (n=3) in Human PCLS treated with control ASO alone (left panel, basal  
925 condition) or after stimulation with Fibrosis Cytokine cocktail and treated with either control  
926 (middle panel) or *PRRX1* (right panel) ASO. Nuclei were counterstained with hematoxylin. The  
927 quantification of picrosirius staining relative to control ASO alone (red dashed line) is showed  
928 on the right (Before-after plot). Scale bar: 50µm. Abbreviations: Precision-Cut Lung slices  
929 (PCLS), Fibrosis Cytokine Cocktail (FC), Control (Cont), Antisense oligonucleotide (ASO),  
930 Stimulation (*stim.*). Wilcoxon test \* p≤0.05.

931

932

**a**

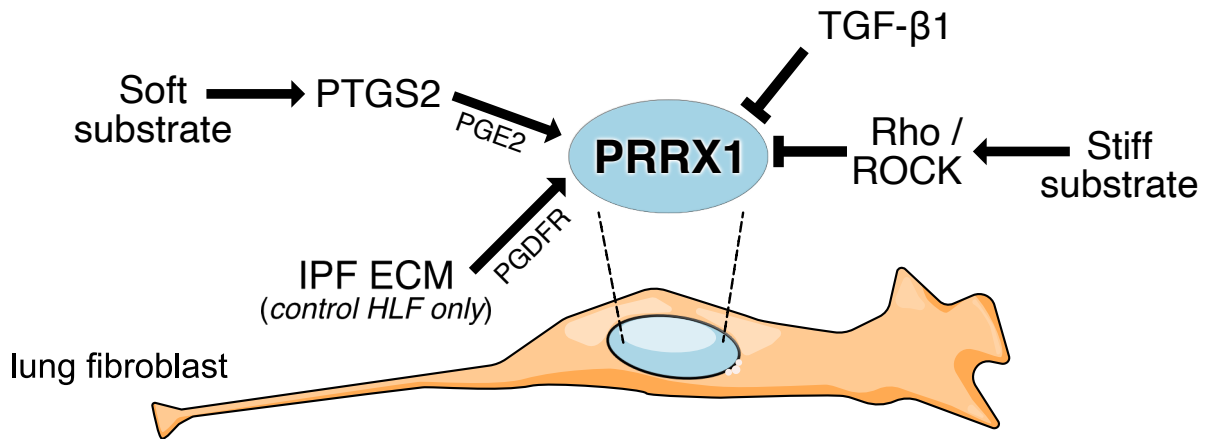

**b**

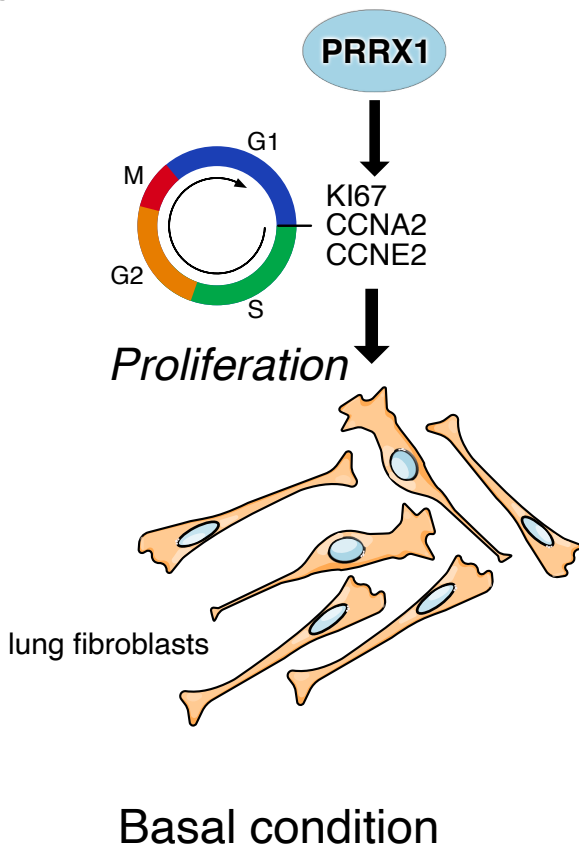

**c**

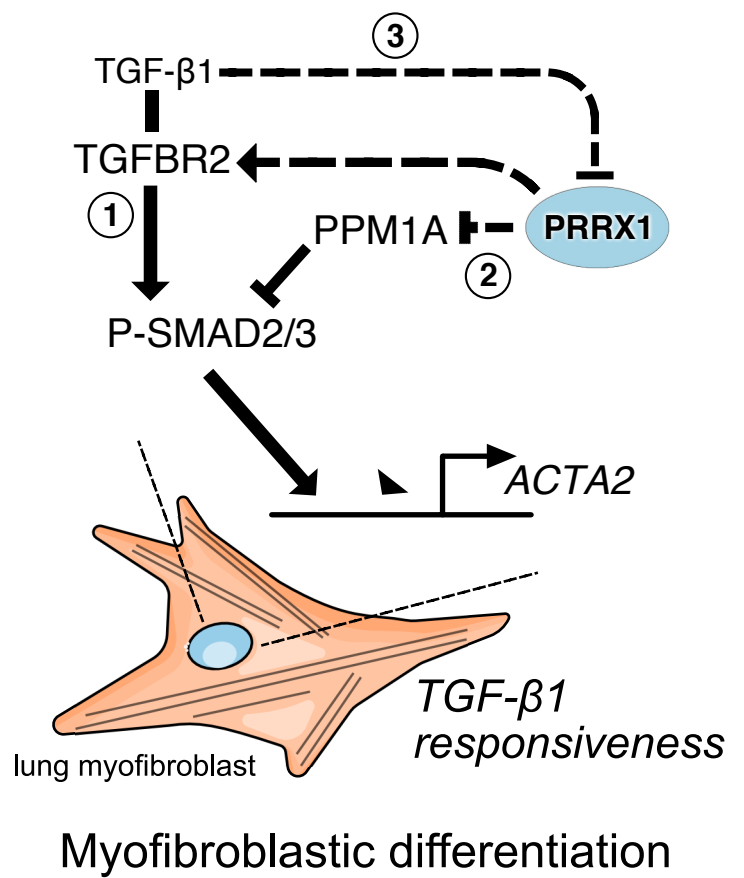

Figure 10

933 **Figure 10: summary sketch of PRRX1 regulation and functions in lung fibroblasts.**

934 (a) Regulation of *PRRX1* TF expression in lung fibroblasts. On one hand, *PRRX1* expression  
935 was up-regulated by the anti-fibrotic factor PGE2 and soft culture substrate (in a *PTGS2*  
936 dependent-manner). IPF fibroblast-derived matrix also increased *PRRX1* TFs expression in a  
937 *PDGFR* dependent manner in control primary lung fibroblasts only. On the other hand, stiff  
938 culture substrate (in a *Rho/ROCK* dependent manner) and TGF- $\beta$ 1 stimulation, which both  
939 promote myofibroblastic differentiation, decreased *PRRX1* TF expression levels in both control  
940 and IPF fibroblasts seeded on plastic. (b) Model of *PRRX1* function in lung fibroblasts at steady  
941 state. In complete growth medium, *PRRX1* TFs influence cell cycle progression by regulating  
942 key factors associated with cycle progression during the G1 and S phases (*KI67*, *Cyclin A2*  
943 and *E2*). *PRRX1* was detected in the promoter regions of those genes by chromatin  
944 immunoprecipitation (ChIP). (c) Model of *PRRX1* function in lung fibroblasts during  
945 myofibroblastic differentiation. (1) TGF- $\beta$ 1 stimulation of lung fibroblasts will trigger their  
946 differentiation into myofibroblasts by promoting the phosphorylation of *SMAD2* and *SMAD3*.  
947 P-*SMAD2/3* will then induce the upregulation of *ACTA2* expression. (2) In presence of *PRRX1*,  
948 the expression of the serine / threonine phosphatase *PPM1A* is downregulating (*PRRX1* TFs  
949 binding to *PPM1A* promoter region was demonstrated by ChIP) and *TGFBR2* expression is  
950 also maintained. Thus, the phosphorylation of *SMAD2* and *SMAD3* is therefore not impacted.  
951 (3) During myofibroblastic differentiation, the expression of *PRRX1* TFs was then decreased  
952 after TGF- $\beta$ 1 treatment for 48h (not at 24h). This negative feedback loop could limit cell-  
953 responsiveness to long exposure of TGF-  $\beta$ 1 by upregulating the expression of *PPM1A* and  
954 downregulating *TGFBR2* levels. Abbreviations: *IPF* (*Idiopathic Pulmonary Fibrosis*), *HLF*  
955 (*Human Lung Fibroblasts*), *ECM* (*Extracellular matrix*), *G1* (*Gap 1 phase 1*), *S* (*Synthesis /*  
956 *Replicative phase*), *G2* (*Gap phase 2*), *M* (*Mitosis*), *CCNA2* (*Cyclin A2*), *CCNE2* (*Cyclin E2*).  
957
